# Supplementary material for: Improving Academic Performance, Belonging, and Retention through Increasing Structure of an Introductory Biology Course
Source: Atypon-hosted journal article supplement (doi:10.1187/cbe.18-08-0155), 2019-11-01
Supplement: combinedsupmats.pdf [file combinedsupmats.pdf]

# Supplemental Material

*CBE—Life Sciences Education*

Wilton *et al.*

# MCDB 1A - Belongingness Survey - F17

---

## Start of Block: Section 1

1 This survey contains 8 sections and takes about 9 minutes to complete. Most of the statements in these sections focus on how you feel about your experiences as a student in **MCDB 1A lecture** at UCSB. The goal of the survey is to improve MCDB 1A by identifying areas of the course that are helpful, and parts of the course that can be improved. **Your honest feedback is greatly appreciated!** Your answers will not be graded in any way. You will receive **bonus course credit** for MCDB1AL for completing this survey. Although some of the statements may seem similar, there are differences between them and you should treat each one as a separate statement; *therefore, the best approach is to answer each question fairly quickly*. That is, for each statement just choose the response that is a reasonable estimate of how you feel about that statement honestly.

---

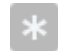

4 UCSB Perm# (UCSB digit ID number - Example: 112233445)

---

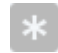

Q34 UCSB Perm# (UCSB digit ID number - Example: 112233445)

---

7 Which section of MCDB1A lecture are you currently enrolled in?

- Section 100 (Christoffersen - Feinstein - Clegg) @ Campbell Hall (1)
  - Section 200 (Wilton - Gonzalez) @ Buchanan Hall (2)
  - NA (3)
-

9 From the list, please select ALL the activities in which you have participated (MARK ALL THAT APPLY)

Biomentors (as Mentee) (1)

Research at a UCSB Lab (2)

Research at another institution (3)

L&S Health Honors program (4)

CLAS for MCDB 1A lecture (5)

---

13 Your data is confidential and will not be shared in connection with your name or your perm number. The goal of this survey is to improve MCDB1A by analyzing the results in aggregate (not individual responses).

However, if you would still like to opt-out of your responses being analyzed to improve this course, please click below.

(1)

---

Page Break

End of Block: Section 1

---

Start of Block: Section 2.1

Q39

Think about your experience with the lecture portion of MCDB 1A **Section 100 or 200**. Please indicate how true each statement is for you.

Rate the following items in terms of how true each one is for you, using this scale:

1-not at all true of me

2-somewhat true of me

3-more true than not of me

4-mostly true of me

5-completely true of me

|                                                                              | 1 (1)                 | 2 (2)                 | 3 (3)                 | 4 (4)                 | 5 (5)                 |
|------------------------------------------------------------------------------|-----------------------|-----------------------|-----------------------|-----------------------|-----------------------|
| If I miss a MCDB1A class, I know students who I could get the notes from (1) | <input type="radio"/> |
| I discuss events which happen outside of class with my classmates (2)        | <input type="radio"/> |
| I have developed personal relationships with other students in MCDB1A (3)    | <input type="radio"/> |
| I feel comfortable volunteering ideas or opinions in MCDB1A (4)              | <input type="radio"/> |
| I feel comfortable asking a question in MCDB1A lecture (5)                   | <input type="radio"/> |

No one in MCDB1A knows anything personal about me (6)

I rarely talk to other students in MCDB1A (7)

I feel comfortable seeking help from my MCDB1A professors before or after class (8)

I feel comfortable asking my MCDB1A professor for help if I do not understand course-related material (9)

I feel comfortable asking my MCDB1A professor for help with a personal problem (10)

I feel that my MCDB1A professor would take the time to talk to me if I needed help (11)

I feel that my  
MCDB1A  
professor  
would be  
sensitive to  
my difficulties  
if I shared  
them (12)

I feel that I  
belong in this  
section of  
MCDB1A  
(13)

End of Block: Section 2.1

---

Start of Block: Section 2.2

Q16 During the **MCDB 1A lecture**, how many times have you gone to the professors' office hours? (ONDAS office hours, regularly scheduled office hours, appointments outside of office hours)

- 0 times (1)
- 1-2 times (2)
- 2-4 times (3)
- 5-10 times (4)
- 11+ times (5)

---

Page Break

---

End of Block: Section 2.2

---

Start of Block: Section 3



Q41

Respond to the statements regarding the MCDB1A lecture using the scale outlined below.

Rate the following items in terms of how true each one is for you, using this scale:

1-not at all true of me

2-somewhat true of me

3-more true than not of me

4-mostly true of me

5-completely true of me

|                                                                                            | 1 (1)                 | 2 (2)                 | 3 (3)                 | 4 (4)                 | 5 (5)                 |
|--------------------------------------------------------------------------------------------|-----------------------|-----------------------|-----------------------|-----------------------|-----------------------|
| When something bad happens, I feel that maybe I don't belong at UCSB (1)                   | <input type="radio"/> |
| I always feel that I belong at UCSB (2)                                                    | <input type="radio"/> |
| In MCDB1A, I sometimes worry that people will dislike me (3)                               | <input type="radio"/> |
| In MCDB1A, I worry that people will think I'm unintelligent if I do poorly (4)             | <input type="radio"/> |
| I am usually confident that others will have a good impression of my ability in MCDB1A (5) | <input type="radio"/> |
| In MCDB1A, I often get nervous and worried when I talk to                                  | <input type="radio"/> |

people (6)

-----  
Page Break

---

End of Block: Section 3

---

Start of Block: Section 4

Q19 Respond to the statements for the MCDB1A lecture using the scale outlined below.

Rate the following items in terms of how true each one is for you, using this scale:

1-not at all true of me

2-somewhat true of me

3-more true than not of me

4-mostly true of me

5-completely true of me

|                                                                         | 1 (1)                 | 2 (2)                 | 3 (3)                 | 4 (4)                 | 5 (5)                 |
|-------------------------------------------------------------------------|-----------------------|-----------------------|-----------------------|-----------------------|-----------------------|
| I believe that MCDB1A has prepared me to do well in my major (1)        | <input type="radio"/> |
| I think that MCDB1A prepared me to earn a fair grade for the course (2) | <input type="radio"/> |
| I'm really looking forward to learning more about Biology (3)           | <input type="radio"/> |
| Biology fascinates me (4)                                               | <input type="radio"/> |
| I think the field of Biology is very interesting (5)                    | <input type="radio"/> |
| To be honest, I just don't find biology interesting (6)                 | <input type="radio"/> |

End of Block: Section 4

---

Start of Block: Section 5



Q29 Respond to the statements using the scale outlined below for the **lecture section of MCDB1A**.

Rate the following items in terms of how true each one is for you, using this scale:

- 1-not at all true of me
- 2-somewhat true of me
- 3-more true than not of me
- 4-mostly true of me
- 5-completely true of me

|                                                                                             | 1 (1)                 | 2 (2)                 | 3 (3)                 | 4 (4)                 | 5 (5)                 |
|---------------------------------------------------------------------------------------------|-----------------------|-----------------------|-----------------------|-----------------------|-----------------------|
| I think what we are learning in MCDB1A is important (1)                                     | <input type="radio"/> |
| The material we are studying in MCDB1A is useful to know (2)                                | <input type="radio"/> |
| I enjoy coming to MCDB 1A lectures (3)                                                      | <input type="radio"/> |
| MCDB 1A lectures promote in-class collaboration with my peers (4)                           | <input type="radio"/> |
| MCDB 1A lecture provides opportunities to self-check my knowledge before the final exam (5) | <input type="radio"/> |
| In MCDB 1A lecture, I feel like I'm part of                                                 | <input type="radio"/> |

a community  
of biology  
students (6)

---

Page Break

---

End of Block: Section 5

---

Start of Block: Section 6



Q43

Please indicate how much you agree with the following statements

1-strongly disagree

2-disagree

3-neither disagree or agree

4-agree

5-strongly agree

|                                                                                           | 1 (1)                 | 2 (2)                 | 3 (3)                 | 4 (4)                 | 5 (5)                 |
|-------------------------------------------------------------------------------------------|-----------------------|-----------------------|-----------------------|-----------------------|-----------------------|
| You have a certain amount of intelligence, and you really can't do much to change it. (1) | <input type="radio"/> |
| Your intelligence is something about you that you can't change very much. (2)             | <input type="radio"/> |
| You can learn new things, but you can't really change your basic intelligence. (3)        | <input type="radio"/> |
| I feel encouraged by my MCDB 1A professor to learn how to succeed in the major (4)        | <input type="radio"/> |
| My MCDB 1A professors are interested in my professional development as a scientist (5)    | <input type="radio"/> |

MCDB 1A is teaching me how to study for my subsequent biology courses (6)

MCDB 1A has helped me identify how I learn (7)

---

Page Break

End of Block: Section 6

---

Start of Block: Section 7

Q45 Respond to the statements using the scale outlined below.

For the following questions, we want to understand how you spent your time this quarter. About how many hours do you spend in a typical 7-day week doing each of the following this quarter?

Scale: 0=0 hours per week; 1=1-5; 2=6-10; 3=11-15; 4=16-20; 5=21-25; 6=26-30; 7=31+

|                                                                                                                                                                            | 0 (1)                 | 1 (2)                 | 2 (3)                 | 3 (4)                 | 4 (5)                 | 5 (6)                 | 6 (7)                 | 7 (8)                 |
|----------------------------------------------------------------------------------------------------------------------------------------------------------------------------|-----------------------|-----------------------|-----------------------|-----------------------|-----------------------|-----------------------|-----------------------|-----------------------|
| Preparing for classes (studying, reading, writing, homework, lab work, etc) (1)                                                                                            | <input type="radio"/> |
| Working for pay on campus (2)                                                                                                                                              | <input type="radio"/> |
| Working for pay off campus (3)                                                                                                                                             | <input type="radio"/> |
| Participating in co-curricular activities (organizations, campus publications, student government, fraternity or sorority, intercollegiate or intramural sports, etc.) (4) | <input type="radio"/> |
| Relaxing and socializing (5)                                                                                                                                               | <input type="radio"/> |
| Providing care for dependents living with you (parents, children, spouse, etc.) (6)                                                                                        | <input type="radio"/> |

Commuting to  
class (driving,  
walking, etc.)  
(7)

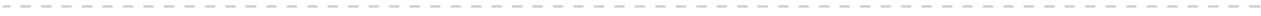

Q32 Please indicate how often you did the following activities this quarter. Consider all of your classes and activities, not just those for this course.

Scale:

0=Never, 1=Once a month, 2=Twice a month, 3=Every week

|                                                                                                   | 0 (1)                 | 1 (2)                 | 2 (3)                 | 3 (4)                 |
|---------------------------------------------------------------------------------------------------|-----------------------|-----------------------|-----------------------|-----------------------|
| Talk with a MCDB1A professor about academic matters, outside of class time (including e-mail) (1) | <input type="radio"/> | <input type="radio"/> | <input type="radio"/> | <input type="radio"/> |
| Meet with an academic advisor concerning academic plans (2)                                       | <input type="radio"/> | <input type="radio"/> | <input type="radio"/> | <input type="radio"/> |
| Meet with a student mentor concerning academic plans (Cheadle Hall, peer mentor, etc.) (3)        | <input type="radio"/> | <input type="radio"/> | <input type="radio"/> | <input type="radio"/> |
| Attend study groups outside of the classroom (4)                                                  | <input type="radio"/> | <input type="radio"/> | <input type="radio"/> | <input type="radio"/> |
| Have informal or social contacts with faculty members outside of classrooms and offices (5)       | <input type="radio"/> | <input type="radio"/> | <input type="radio"/> | <input type="radio"/> |

---

Page Break

End of Block: Section 7

---

Start of Block: Section 8

Q36 Have your experiences in **MCDB1A lecture** made you more sure or less sure of your major?

- More Sure (1)
  - Less Sure (2)
  - No effect (3)
- 

Q37 Please explain how this quarter has made you more sure or less sure

---

Q38 Are you thinking of changing your major?

- Yes (1)
  - No (2)
- 

Q39 How likely are you to change majors within the next year?

- Extremely likely (1)
- Somewhat likely (2)
- Neither likely nor unlikely (3)
- Somewhat unlikely (4)
- Extremely unlikely (5)

---

Q32 If you are thinking about changing majors, which major or majors are you considering switching to?

---

---

Q33 If you are thinking about changing majors, what are the main reasons you would make the switch?

---

---

Page Break



End of Block: Section 8

---

## Output from Survey Data

**Summary***Available scales*

- Sense of belonging ( $\alpha = 0.85$ )
  - Peer relationships subscale ( $\alpha = 0.85$ )
  - Faculty relationships ( $\alpha = 0.85$ )
  - Classroom comfort ( $\alpha = 0.76$ )
- Interest in Biology ( $\alpha = 0.90$ )
- Perceived utility of Biology ( $\alpha = 0.90$ )
- Academic integration (individual items)
- Academic and social concerns ( $\alpha = 0.67$ )
- Belonging uncertainty ( $\alpha = 0.77$ )
- Growth mindset ( $\alpha = 0.92$ )
- Course satisfaction (individual items)

*Hypothesis testing*

1. When limited to only Biology majors, **sense of belonging is greater** among students in the High Structure lecture section. This is also true for the following subscales of belonging:
  - a. Peer relationships
  - b. Faculty relationships
  - c. Classroom comfort
2. These findings regarding sense of belonging are also significant when including all non-Bio majors
3. Students in the High Structure lecture section **did not have greater interest** in the subject of Biology
4. Students in the High Structure lecture section **did not have greater perceived utility** in the subject of Biology
5. **When limited to Biology majors, sense of belonging is greater** among students in the High Structure lecture section for minority groups
  - a. EOP students
  - b. URM students
    - i. **Although EOP and URM students both have higher belonging in the High Structure section, the difference is not more pronounced than the effect of being in the High Structure section for non-EOP and non-URM students**

## Scales & Alphas

### *Sense of belonging (with subscales)*

| Scale Name                                                                                                                                                                  | Alpha<br>(Items)              | Items                                                                                                                                                                                                                                                                                                                       |
|-----------------------------------------------------------------------------------------------------------------------------------------------------------------------------|-------------------------------|-----------------------------------------------------------------------------------------------------------------------------------------------------------------------------------------------------------------------------------------------------------------------------------------------------------------------------|
| Sense of Belonging                                                                                                                                                          | $\alpha = 0.85$<br>(12 items) | All items in subscales below                                                                                                                                                                                                                                                                                                |
| Perceived peer support                                                                                                                                                      | $\alpha = 0.85$<br>(5 items)  | "I know students I could get notes from in MCDB1A"<br>"I discuss outside events with classmates"<br>"I have relationships with students in MCDB1A"<br>"No one in MCDB1A knows me well personally" (reverse coded)<br>"I rarely talk to others in MCDB1A" (reverse coded)                                                    |
| Perceived faculty support                                                                                                                                                   | $\alpha = 0.85$<br>(5 items)  | "I can seek help from MCDB1A profs before/after class"<br>"I'm comfortable asking MCDB1A prof for help with course material"<br>"I'm comfortable asking MCDB1A prof for help with a personal problem"<br>"My MCDB1A prof would take time for me if I needed help"<br>"My MCDB1A prof would be sensitive to my difficulties" |
| Perceived classroom comfort                                                                                                                                                 | $\alpha = 0.76$<br>(2 items)  | "I feel comfortable volunteering ideas in MCDB1A"<br>"I'm comfortable asking a question in MCDB1A"                                                                                                                                                                                                                          |
| Response scale for all items:<br>1. Not at all true of me<br>2. Somewhat true of me<br>3. More true than not true of me<br>4. Mostly true of me<br>5. Completely true of me |                               |                                                                                                                                                                                                                                                                                                                             |

*Note.* Factor analysis produced a factor structure consistent with Tovar and Simon's (2010) most recent factor analysis of Hoffman et al.'s Sense of Belonging Scale (SOBS) (2003).

*Interest in Biology*

Items

1. "I'm looking forward to learning more about Biology"
2. "Biology fascinates me"
3. "The field of Biology is very interesting"
4. "I just don't find Biology that interesting" (reverse coded)

Response scale for all items:

1. Not at all true of me
2. Somewhat true of me
3. More true than not true of me
4. Mostly true of me
5. Completely true of me

Alpha:  $\alpha = 0.90$

*Perceived utility of Biology*

Items

1. "MCDB1A material is important"
2. "MCDB1A material is useful"

Response scale for all items:

1. Not at all true of me
2. Somewhat true of me
3. More true than not true of me
4. Mostly true of me
5. Completely true of me

Alpha:  $\alpha = 0.90$

### *Academic integration*

#### Items

1. “Frequency talking with MCDB1A prof about academics outside class”
2. “Frequency meeting with academic advisor”
3. “Frequency meeting with a student mentor”
4. “Frequency attending study groups outside class”
5. “Frequency talking with faculty socially outside class”

Response scale for all items:

1. Never
2. Once a month
3. Twice a month
4. Every week

Alpha: None of these items are highly correlated. No combination of items produces a scale with an alpha higher than 0.55 (which indicates they are not measuring a common, higher-order construct). My subsequent recommendation is to only use single items of greatest interest in future analyses.

### *Academic and social concerns*

#### Items

1. “Sometimes I worry people in MCDB1A will dislike me”
2. “I worry people in MCDB1A will think I'm unintelligent if I do poorly”
3. “I'm usually confident others in MCDB1A have good impression of my ability” (reverse coded)
4. “I often get worried when I talk to people in MCDB1A”

Response scale for all items:

1. Not at all true of me
2. Somewhat true of me
3. More true than not true of me
4. Mostly true of me
5. Completely true of me

*Note.* This response scale means that higher scores indicate *more* concerns/worry

Alpha:  $\alpha = 0.67$  (this is not great, but acceptable)

### **Belonging uncertainty**

#### Items

1. “Sometimes I feel I don't belong at UCSB when bad things happen”
2. “I always feel I belong at UCSB” (reverse coded)

Response scale for all items:

1. Not at all true of me
2. Somewhat true of me
3. More true than not true of me
4. Mostly true of me
5. Completely true of me

*Note.* This response scale means that higher scores indicate *more* belonging uncertainty

Alpha:  $\alpha = 0.77$

### **Growth mindset**

#### Items

1. “You have a certain amount of intelligence, and that can't be changed”
2. “Intelligence can't be changed very much”
3. “You can learn new things, but you can't change your basic intelligence”

Response scale for all items:

1. Strongly disagree
2. Disagree
3. Neither agree nor disagree
4. Agree
5. Strongly Agree

*Note.* This response scale means that *lower* scores indicate a growth mindset

Alpha:  $\alpha = 0.92$  (This is very reliable. It is easy to see why. All items sound the same)

### **Course satisfaction**

I can look at the following items individually if you'd like. I'd look at them individually because they are on various topics and likely wouldn't create good scales.

My impression is that these are the items you guys added because these questions capture your hypotheses about exactly what your section is better-suited to accomplish. They are not validated scales, like the ones above, but if these items better capture your hypothesized mechanisms for the impact of the course, then I would encourage you to take a look at these.

Items:

1. "MCDB1A prepared me to do well in my major"
2. "MCDB1A prepared me to earn fair grade for the course"
3. "I enjoy coming to MCDB1A lectures"
4. "MCDB1A lectures promote in-class peer collaboration"
5. "The MCDB1A lecture gives me help before final"
6. "I feel like a part of a Biology community in MCDB1A"
7. "I feel encouraged by my MCDB1A instructors to learn to succeed in major"
8. "My MCDB1A professors are interested in my professional development as a scientist"
9. "MCDB1A is teaching me how to study for future courses"
10. "MCDB1A helped me identify how I learn"

**Hypothesis Testing**

*Note.* All analyses below are limited to students who are Biology majors

|                       | <b>Large Lecture</b> | <b>Highly Structured</b> |
|-----------------------|----------------------|--------------------------|
| <b>Non-Bio Majors</b> | 237                  | 12                       |
| <b>Bio Majors</b>     | 162                  | 171                      |

**Hypothesis 1:** Students in the high structure lecture will have greater sense of belonging (to their MCDB 1A course) at the end of the course.

**Figure 1. Distribution of Sense of Belonging (Full scale) by Section**

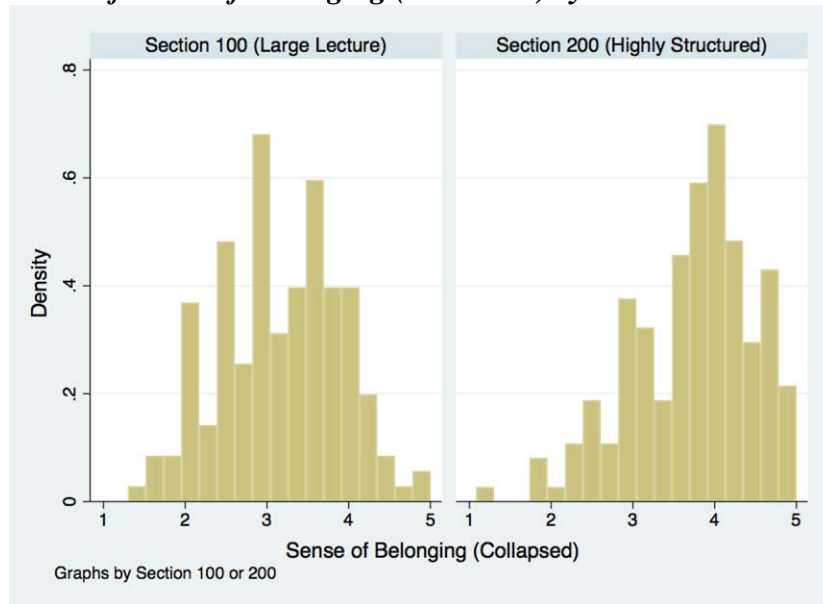

**Table 1. t-test of Mean Difference – Sense of Belonging (Full scale) by Section**

Two-sample t test with equal variances

| Group                                | Obs | Mean                             | Std. Err. | Std. Dev.          | [95% Conf. Interval]     |           |
|--------------------------------------|-----|----------------------------------|-----------|--------------------|--------------------------|-----------|
| Section1                             | 162 | <b>3.158483</b>                  | .0565815  | .7201646           | 3.046745                 | 3.270221  |
| Section2                             | 171 | <b>3.720273</b>                  | .0573607  | .7500882           | 3.607042                 | 3.833504  |
| combined                             | 333 | 3.44697                          | .0431035  | .786565            | 3.362179                 | 3.53176   |
| diff                                 |     | -.5617899                        | .0806601  |                    | -.720461                 | -.4031189 |
| diff = mean(Section) - mean(Section) |     |                                  |           |                    | <b>t = -6.9649</b>       |           |
| Ho: diff = 0                         |     |                                  |           |                    | degrees of freedom = 331 |           |
| Ha: diff < 0                         |     | Ha: diff != 0                    |           | Ha: diff > 0       |                          |           |
| Pr(T < t) = 0.0000                   |     | <b>Pr( T  &gt;  t ) = 0.0000</b> |           | Pr(T > t) = 1.0000 |                          |           |

**Conclusion: Students in Section 200 have a significantly higher sense of belonging (p<0.001)**





UCSB MCDB 1A Survey Analyses

**Table 1r. Regression of Sense of Belonging (Full scale and subscales) on Section, EOP status, and URM status (standardized)**  
*Predicting Sense of Belonging and its Subcomponents by Section, EOP Status, and URM Status*

|                                              | <u>Sense of belonging (all)</u> |                          |                          | <u>Perceived Peer Support</u> |                        |                        | <u>Perceived Faculty Support</u> |                          |                          | <u>Classroom Comfort</u> |                          |                          |
|----------------------------------------------|---------------------------------|--------------------------|--------------------------|-------------------------------|------------------------|------------------------|----------------------------------|--------------------------|--------------------------|--------------------------|--------------------------|--------------------------|
|                                              | model 1                         | model 2                  | model 3                  | model 1                       | model 2                | model 3                | model 1                          | model 2                  | model 3                  | model 1                  | model 2                  | model 3                  |
| High structured section                      | <b>0.33***</b><br>(0.06)        | <b>0.36***</b><br>(0.13) | <b>0.30***</b><br>(0.08) | 0.09<br>(0.12)                | 0.00<br>(0.24)         | 0.03<br>(0.14)         | <b>0.40***</b><br>(0.10)         | <b>0.46***</b><br>(0.20) | <b>0.36***</b><br>(0.12) | <b>0.27***</b><br>(0.13) | <b>0.27*</b><br>(0.25)   | <b>0.31***</b><br>(0.15) |
| <i>Interactions</i>                          |                                 |                          |                          |                               |                        |                        |                                  |                          |                          |                          |                          |                          |
| <i>Section x Race</i>                        |                                 |                          |                          |                               |                        |                        |                                  |                          |                          |                          |                          |                          |
| High structured section<br>x Asian (vs. URM) |                                 | -0.02<br>(0.16)          |                          |                               | 0.02<br>(0.31)         |                        |                                  | 0.02<br>(0.26)           |                          |                          | -0.05<br>(0.32)          |                          |
| High structured section<br>x White (vs. URM) |                                 | -0.04<br>(0.16)          |                          |                               | 0.15<br>(0.30)         |                        |                                  | -0.13<br>(0.25)          |                          |                          | 0.04<br>(0.32)           |                          |
| <i>Section x Income</i>                      |                                 |                          |                          |                               |                        |                        |                                  |                          |                          |                          |                          |                          |
| High structured section<br>x EOP status      |                                 |                          | -0.07<br>(0.13)          |                               |                        | -0.15<br>(0.25)        |                                  |                          | -0.10<br>(0.21)          |                          |                          | 0.09<br>(0.26)           |
| <i>Covariates</i>                            |                                 |                          |                          |                               |                        |                        |                                  |                          |                          |                          |                          |                          |
| <i>Race</i>                                  |                                 |                          |                          |                               |                        |                        |                                  |                          |                          |                          |                          |                          |
| Asian (vs. URM)                              | -0.03<br>(0.09)                 | -0.02<br>(0.12)          | -0.03<br>(0.09)          | -0.02<br>(0.16)               | -0.04<br>(0.22)        | -0.04<br>(0.16)        | 0.01<br>(0.13)                   | 0.00<br>(0.19)           | 0.00<br>(0.14)           | -0.13<br>(0.17)          | -0.10<br>(0.24)          | -0.12<br>(0.17)          |
| White (vs. URM)                              | -0.03<br>(0.09)                 | 0.00<br>(0.12)           | -0.03<br>(0.09)          | -0.06<br>(0.16)               | -0.16<br>(0.23)        | -0.08<br>(0.16)        | 0.02<br>(0.14)                   | 0.10<br>(0.19)           | 0.01<br>(0.14)           | -0.06<br>(0.17)          | -0.08<br>(0.24)          | -0.05<br>(0.17)          |
| <i>Income</i>                                |                                 |                          |                          |                               |                        |                        |                                  |                          |                          |                          |                          |                          |
| EOP Status                                   | -0.05<br>(0.08)                 | -0.05<br>(0.08)          | -0.01<br>(0.10)          | -0.08<br>(0.15)               | -0.09<br>(0.15)        | 0.01<br>(0.19)         | -0.03<br>(0.12)                  | -0.03<br>(0.12)          | 0.03<br>(0.16)           | 0.02<br>(0.15)           | 0.02<br>(0.15)           | -0.04<br>(0.20)          |
| <i>Gender</i>                                |                                 |                          |                          |                               |                        |                        |                                  |                          |                          |                          |                          |                          |
| Female                                       | -0.06<br>(0.07)                 | -0.05<br>(0.07)          | -0.05<br>(0.07)          | <b>0.14*</b><br>(0.13)        | <b>0.14*</b><br>(0.13) | <b>0.15*</b><br>(0.13) | -0.08<br>(0.11)                  | -0.07<br>(0.11)          | -0.07<br>(0.11)          | <b>-0.14*</b><br>(0.13)  | <b>-0.14**</b><br>(0.13) | <b>-0.14**</b><br>(0.13) |
| <i>N</i>                                     | 317                             | 317                      | 317                      | 317                           | 317                    | 317                    | 317                              | 317                      | 317                      | 317                      | 317                      | 317                      |

*Note.* All sense of belonging variables on a scale from (1) low ... (5) high. All coefficients are in standard deviation units. Model 1 estimates main effect of section controlling for covariates. Model 2 includes an estimate of the interaction between section and race. Model 3 includes an estimate of the interaction. Reference category for high structured section is traditional large lecture. Reference category for race is URM, which includes Black and Hispanic students. Reference category for EOP status is non-EOP students. Reference category for female is male. status is non-EOP students. Reference category for female is male. All models additionally control for prior achievement (SAT scores and cumulative GPA in science). Standard errors in parentheses. \* $p < .05$ , \*\* $p < .01$ , \*\*\* $p < .001$

## UCSB MCDB 1A Survey Analyses

**Conclusion.** For this question, we look at model 1. After controlling for gender, ethnicity, and achievement (SAT scores and cumulative science GPA), Model 1 shows that being in the High Structure section is associated with a 0.33 standard deviation increase in sense of belonging. This effect seems to be driven by a significant effect on perceived faculty support and classroom comfort, while not affecting perceived peer support.

**Figure 1a. Distribution of Sense of Belonging (Peer Relationships subscale) by Section**

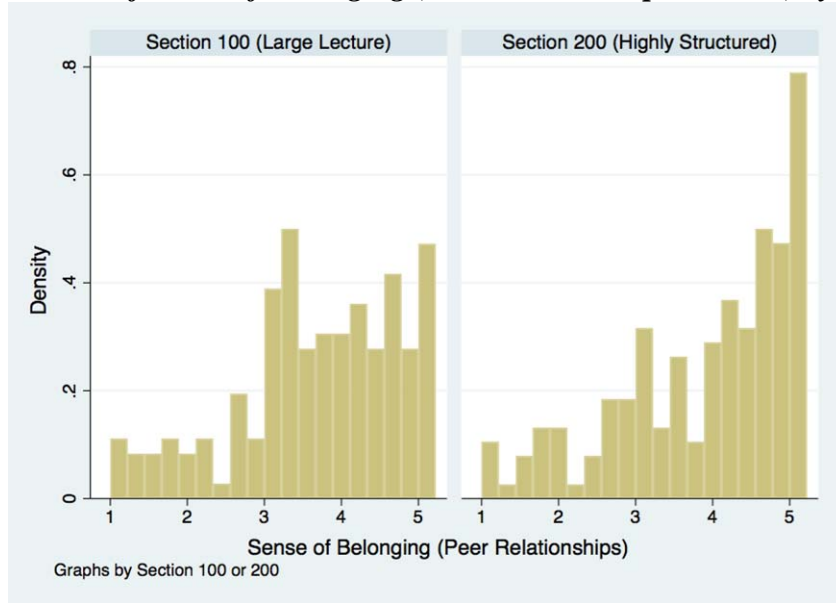

**Table 1a. Equality of Medians Test– Sense of Belonging (Peer Relationships subscale) by Section**

Median test

| Greater than the median? | Section 1 | Section 2 | Total |
|--------------------------|-----------|-----------|-------|
| no                       | 97        | 78        | 175   |
| yes                      | 65        | 93        | 158   |
| Total                    | 162       | 171       | 333   |

Pearson  $\chi^2(1) = 6.7866$  Pr = **0.009**

Continuity corrected:

Pearson  $\chi^2(1) = 6.2267$  Pr = 0.013

**Conclusion: Students in Section 200 have significantly stronger peer relationships ( $p < 0.01$ )**

*Note.* A t-test could not be run because it relies on the assumption that the data are Normally distributed. When this is not the case, I use a non-parametric test “equality of medians” test due to the non-Normality of the distributions. I will also use these for the other subscales. This test operates by finding the median of the distribution when the groups are *combined*. It then uses a Chi-squared test to see if cases in the two groups disproportionately fall on one side of the distribution. In the example above, more section 2 students fall above the median than below it, whereas the opposite is true for section 1 students. This suggests the groups are significantly different from each other.

**Figure 1b. Distribution of Sense of Belonging (Faculty Relationshipssubscale) by Section**

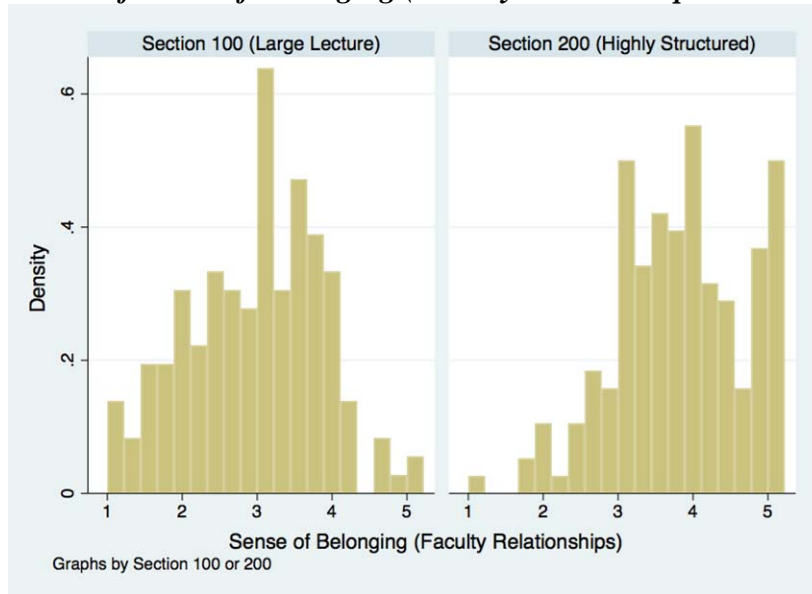

**Table 1b. Equality of MediansTest– Sense of Belonging (Faculty Relationshipssubscale) by Section**

Median test

| Greater than the median? | Section 1 | Section 2 | Total |
|--------------------------|-----------|-----------|-------|
| no                       | 125       | 73        | 198   |
| yes                      | 37        | 98        | 135   |
| Total                    | 162       | 171       | 333   |

Pearson chi2(1) = 41.0062 Pr = **0.000**

Continuity corrected:

Pearson chi2(1) = 39.5887 Pr = 0.000

**Conclusion: Students in Section 200 have significantly stronger faculty relationships (p<0.01)**

**Figure 1c. Distribution of Sense of Belonging (Classroom comfortsubscale) by Section**

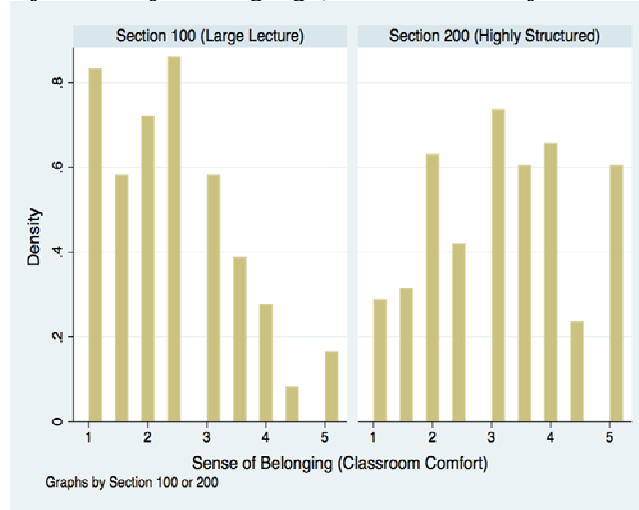

**Table 1c. Equality of Medians Test– Sense of Belonging (Faculty Relationshipsubscale) by Section**

Median test

| Greater than the median? | Section 1 | Section 2 | Total |
|--------------------------|-----------|-----------|-------|
| no                       | 108       | 63        | 171   |
| yes                      | 54        | 108       | 162   |
| Total                    | 162       | 171       | 333   |

Pearson chi2(1) = 29.6205 Pr = 0.000

Continuity corrected:

Pearson chi2(1) = 28.4387 Pr = 0.000

**Conclusion: Students in Section 200 perceive significantly greater classroom comfort (p<0.001)**

Note. Hypothesis 2 incorporates all students regardless of major.

|                | Large Lecture | Highly Structured |
|----------------|---------------|-------------------|
| Non-Bio Majors | 237           | 12                |
| Bio Majors     | 162           | 171               |
| <b>Total</b>   | <b>399</b>    | <b>183</b>        |

**Hypothesis 2:** Students in the high structure lecture (all students) will have greater sense of belonging (to their MCDB 1A course) at the end of the course.

**Figure 2. Distribution of Sense of Belonging (Full scale) by Section**

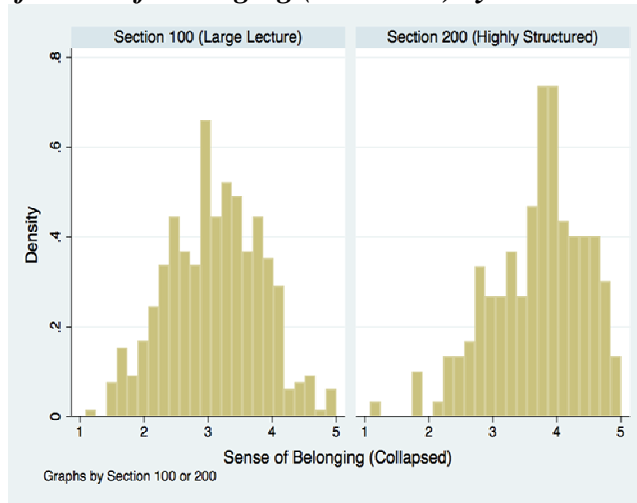

**Table 2. t-test of Mean Difference – Sense of Belonging (Full scale) by Section**

Two-sample t test with equal variances

| Group                                | Obs | Mean                          | Std. Err. | Std. Dev.          | [95% Conf. Interval]     |           |
|--------------------------------------|-----|-------------------------------|-----------|--------------------|--------------------------|-----------|
| Section 100                          | 399 | <b>3.101561</b>               | .0373396  | .7458577           | 3.028153                 | 3.174968  |
| Section 200                          | 183 | <b>3.713115</b>               | .0548311  | .741742            | 3.604928                 | 3.821301  |
| combined                             | 582 | 3.293853                      | .0330102  | .7963592           | 3.22902                  | 3.358687  |
| diff                                 |     | -.611554                      | .0664744  |                    | -.7421139                | -.4809942 |
| diff = mean(Section) - mean(Section) |     |                               |           |                    | <b>t = -9.1998</b>       |           |
| Ho: diff = 0                         |     |                               |           |                    | degrees of freedom = 580 |           |
| Ha: diff < 0                         |     | Ha: diff != 0                 |           | Ha: diff > 0       |                          |           |
| Pr(T < t) = 0.0000                   |     | Pr( T  >  t ) = <b>0.0000</b> |           | Pr(T > t) = 1.0000 |                          |           |

**Conclusion:** Students in Section 200 have a significantly higher sense of belonging (p<0.001)

**Note.** In section 1, the Bio majors don't have significantly different sense of belonging when compared to non-Bio majors. Therefore, the results from hypothesis 1 should also be significant among all majors.

**Hypothesis 3:** Students in the high structure lecture (all students) will have greater interest in the subject of Biology at the end of the course.

**Figure 3. Distribution of Interest in Biology by Section**

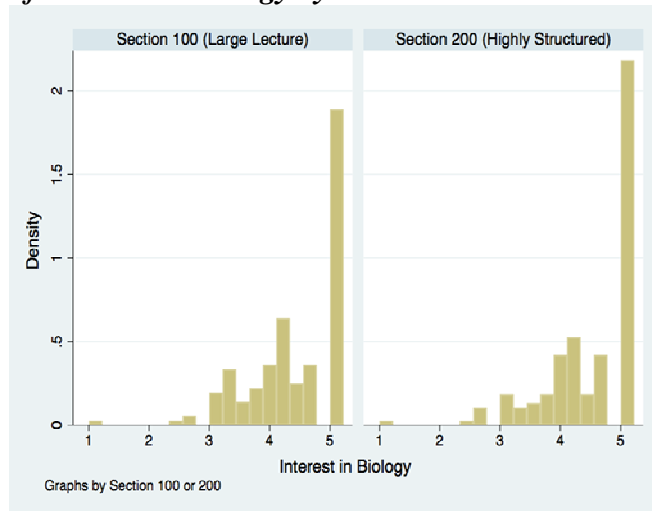

**Table 3. Equality of Medians Test– Interest in Biology by Section**

Median test

| Greater than the median | Section 100 or 200 |           | Total |
|-------------------------|--------------------|-----------|-------|
|                         | Section 1          | Section 2 |       |
| no                      | 94                 | 88        | 182   |
| yes                     | 68                 | 83        | 151   |
| Total                   | 162                | 171       | 333   |

Pearson chi2(1) = 1.4457 Pr = 0.229

Continuity corrected:

Pearson chi2(1) = 1.1930 Pr = 0.275

**Conclusion:** Students in Section 200 do not have a significantly different interest in Biology ( $p > 0.05$ )



**Hypothesis 4:** Students in the high structure lecture (all students) will have greater perceived utility in the subject of Biology at the end of the course.

**Figure 4. Distribution of Perceived Utility in Biology by Section**

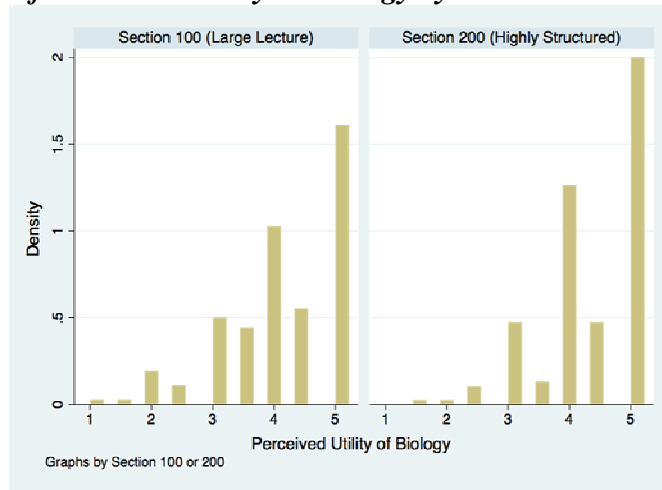

**Table 3. Equality of Medians Test – Perceived Utility in Biology by Section**

Median test

| Greater than the median | Section 100 or 200 |           | Total |
|-------------------------|--------------------|-----------|-------|
|                         | Section 1          | Section 2 |       |
| no                      | 104                | 95        | 199   |
| yes                     | 58                 | 76        | 134   |
| Total                   | 162                | 171       | 333   |

Pearson chi2(1) = 2.5836 Pr = 0.108

Continuity corrected:

Pearson chi2(1) = 2.2367 Pr = 0.135

**Conclusion:** Students in Section 200 do not have a significantly different perceived utility value in Biology ( $p > 0.05$ )

**Hypothesis 5a:** EOP students in the high structure lecture will have greater sense of belonging (to their MCDB 1A course) than EOP students in the large lecture at the end of the course.

**Figure 5a. Distribution of Sense of Belonging (Full scale) by Section (EOP only)**

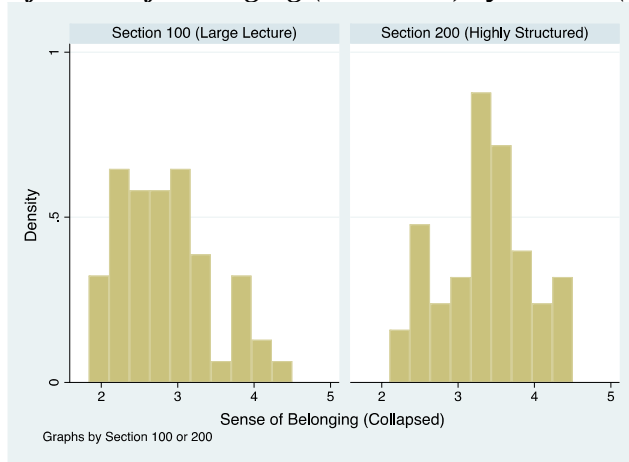

**Table 5a. t-test of Mean Difference – Sense of Belonging (Full scale) by Section (EOP only)**

Two-sample t test with equal variances

| Group                                | Obs | Mean                             | Std. Err. | Std. Dev.            | [95% Conf. Interval] |           |
|--------------------------------------|-----|----------------------------------|-----------|----------------------|----------------------|-----------|
| Section1                             | 58  | 2.833333                         | .0799368  | .6087808             | 2.673263             | 2.993404  |
| Section2                             | 47  | 3.347518                         | .0865129  | 3.175311             | 3.519724             |           |
| combined                             | 105 | 3.063492                         | .0633416  | .6490587             | 2.937883             | 3.189101  |
| diff                                 |     | -.5141844                        | .1175476  |                      | -.7473123            | -.2810565 |
| diff = mean(Section) - mean(Section) |     |                                  |           |                      | <b>t = -4.3743</b>   |           |
| Ho: diff = 0                         |     |                                  |           | degrees of freedom = | 103                  |           |
| Ha: diff < 0                         |     | Ha: diff != 0                    |           | Ha: diff > 0         |                      |           |
| Pr(T < t) = 0.0000                   |     | <b>Pr( T  &gt;  t ) = 0.0000</b> |           | Pr(T > t) = 1.0000   |                      |           |

**Conclusion: EOP students in Section 200 have a significantly higher sense of belonging (full scale)(p<0.001) than EOP students in Section 100.**

**Figure 5ai. Distribution of Sense of Belonging (Peer Support subscale) by Section (EOP only)**

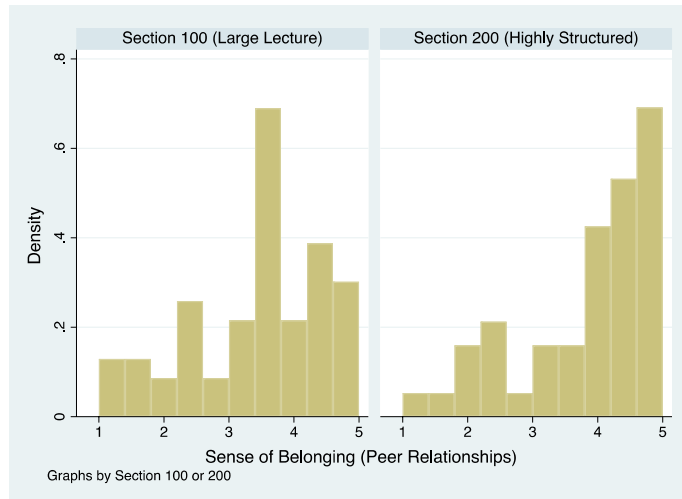

**Table 5ai. Equality of Medians Test– Sense of Belonging (Peer Support subscale) by Section (EOP only)**

Median test

| Greater than the median | Section 100 or 200 |           | Total |
|-------------------------|--------------------|-----------|-------|
|                         | Section 1          | Section 2 |       |
| no                      | 37                 | 16        | 53    |
| yes                     | 21                 | 31        | 52    |
| Total                   | 58                 | 47        | 105   |

Pearson chi2(1) = 9.1923 Pr = 0.002

Continuity corrected:

Pearson chi2(1) = 8.0407 Pr = 0.005

**Conclusion: EOP students in Section 200 have significantly perceived peer support (p<0.01) than EOP students in Section 100.**

**Figure 5a.ii. Distribution of Sense of Belonging (Faculty Support subscale) by Section (EOP only)**

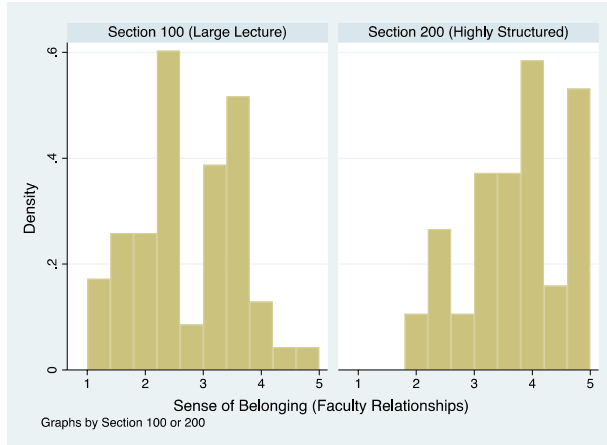

**Table 5a.iii. Equality of Medians Test– Sense of Belonging (Faculty Support subscale) by Section (EOP only)**

Median test

| Greater than the median | Section 1 | Section 2 | Total |
|-------------------------|-----------|-----------|-------|
| no                      | 41        | 16        | 57    |
| yes                     | 17        | 31        | 48    |
| Total                   | 58        | 47        | 105   |

Pearson chi2(1) = 14.0501 Pr = 0.000

Continuity corrected:

Pearson chi2(1) = 12.6121 Pr = 0.000

**Conclusion: EOP students in Section 200 have a significantly higher perceived faculty support (p<0.001) than EOP students in Section 100.**

**Figure 5a.iii. Distribution of Sense of Belonging (Classroom Comfort subscale) by Section (EOP only)**

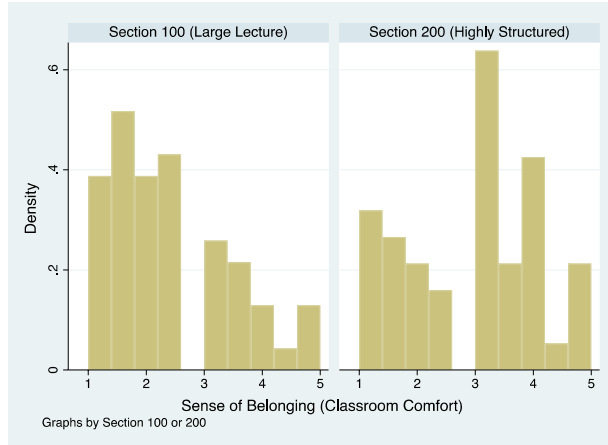

**Table 5a.iii. Equality of Medians Test– Sense of Belonging (Classroom Comfort subscale) by Section (EOP only)**

| Greater than the median | Section 100 or 200 |           | Total |
|-------------------------|--------------------|-----------|-------|
|                         | Section 1          | Section 2 |       |
| no                      | 40                 | 18        | 58    |
| yes                     | 18                 | 29        | 47    |
| Total                   | 58                 | 47        | 105   |

Pearson chi2(1) = 9.8753 Pr = 0.002

Continuity corrected:

Pearson chi2(1) = 8.6739 Pr = 0.003

**Conclusion: EOP students in Section 200 have a significantly higher perceived classroom comfort (p<0.01) than EOP students in Section 100.**



UCSB MCDB 1A Survey Analyses

**Table 5ar. Regression of Sense of Belonging (Full scale and subscales) on Section, EOP status, and URM status (standardized)**  
*Predicting Sense of Belonging and its Subcomponents by Section, EOP Status, and URM Status*

|                                              | <u>Sense of belonging (all)</u> |                          |                          | <u>Perceived Peer Support</u> |                        |                        | <u>Perceived Faculty Support</u> |                          |                          | <u>Classroom Comfort</u> |                          |                          |
|----------------------------------------------|---------------------------------|--------------------------|--------------------------|-------------------------------|------------------------|------------------------|----------------------------------|--------------------------|--------------------------|--------------------------|--------------------------|--------------------------|
|                                              | model 1                         | model 2                  | model 3                  | model 1                       | model 2                | model 3                | model 1                          | model 2                  | model 3                  | model 1                  | model 2                  | model 3                  |
| High structured section                      | <b>0.33***</b><br>(0.06)        | <b>0.36***</b><br>(0.13) | <b>0.30***</b><br>(0.08) | 0.09<br>(0.12)                | 0.00<br>(0.24)         | 0.03<br>(0.14)         | <b>0.40***</b><br>(0.10)         | <b>0.46***</b><br>(0.20) | <b>0.36***</b><br>(0.12) | <b>0.27***</b><br>(0.13) | <b>0.27*</b><br>(0.25)   | <b>0.31***</b><br>(0.15) |
| <i><u>Interactions</u></i>                   |                                 |                          |                          |                               |                        |                        |                                  |                          |                          |                          |                          |                          |
| <i>Section x Race</i>                        |                                 |                          |                          |                               |                        |                        |                                  |                          |                          |                          |                          |                          |
| High structured section<br>x Asian (vs. URM) |                                 | -0.02<br>(0.16)          |                          |                               | 0.02<br>(0.31)         |                        |                                  | 0.02<br>(0.26)           |                          |                          | -0.05<br>(0.32)          |                          |
| High structured section<br>x White (vs. URM) |                                 | -0.04<br>(0.16)          |                          |                               | 0.15<br>(0.30)         |                        |                                  | -0.13<br>(0.25)          |                          |                          | 0.04<br>(0.32)           |                          |
| <i>Section x Income</i>                      |                                 |                          |                          |                               |                        |                        |                                  |                          |                          |                          |                          |                          |
| High structured section<br>x EOP status      |                                 |                          | <b>-0.07</b><br>(0.13)   |                               |                        | <b>-0.15</b><br>(0.25) |                                  |                          | <b>-0.10</b><br>(0.21)   |                          |                          | <b>0.09</b><br>(0.26)    |
| <i><u>Covariates</u></i>                     |                                 |                          |                          |                               |                        |                        |                                  |                          |                          |                          |                          |                          |
| <i>Race</i>                                  |                                 |                          |                          |                               |                        |                        |                                  |                          |                          |                          |                          |                          |
| Asian (vs. URM)                              | -0.03<br>(0.09)                 | -0.02<br>(0.12)          | -0.03<br>(0.09)          | -0.02<br>(0.16)               | -0.04<br>(0.22)        | -0.04<br>(0.16)        | 0.01<br>(0.13)                   | 0.00<br>(0.19)           | 0.00<br>(0.14)           | -0.13<br>(0.17)          | -0.10<br>(0.24)          | -0.12<br>(0.17)          |
| White (vs. URM)                              | -0.03<br>(0.09)                 | 0.00<br>(0.12)           | -0.03<br>(0.09)          | -0.06<br>(0.16)               | -0.16<br>(0.23)        | -0.08<br>(0.16)        | 0.02<br>(0.14)                   | 0.10<br>(0.19)           | 0.01<br>(0.14)           | -0.06<br>(0.17)          | -0.08<br>(0.24)          | -0.05<br>(0.17)          |
| <i>Income</i>                                |                                 |                          |                          |                               |                        |                        |                                  |                          |                          |                          |                          |                          |
| EOP Status                                   | -0.05<br>(0.08)                 | -0.05<br>(0.08)          | -0.01<br>(0.10)          | -0.08<br>(0.15)               | -0.09<br>(0.15)        | 0.01<br>(0.19)         | -0.03<br>(0.12)                  | -0.03<br>(0.12)          | 0.03<br>(0.16)           | 0.02<br>(0.15)           | 0.02<br>(0.15)           | -0.04<br>(0.20)          |
| <i>Gender</i>                                |                                 |                          |                          |                               |                        |                        |                                  |                          |                          |                          |                          |                          |
| Female                                       | -0.06<br>(0.07)                 | -0.05<br>(0.07)          | -0.05<br>(0.07)          | <b>0.14*</b><br>(0.13)        | <b>0.14*</b><br>(0.13) | <b>0.15*</b><br>(0.13) | -0.08<br>(0.11)                  | -0.07<br>(0.11)          | -0.07<br>(0.11)          | <b>-0.14*</b><br>(0.13)  | <b>-0.14**</b><br>(0.13) | <b>-0.14**</b><br>(0.13) |
| <i>N</i>                                     | 317                             | 317                      | 317                      | 317                           | 317                    | 317                    | 317                              | 317                      | 317                      | 317                      | 317                      | 317                      |

*Note.* All sense of belonging variables on a scale from (1) low ... (5) high. All coefficients are in standard deviation units. Model 1 estimates main effect of section controlling for covariates. Model 2 includes an estimate of the interaction between section and race. Model 3 includes an estimate of the interaction. Reference category for high structured section is traditional large lecture. Reference category for race is URM, which includes Black and Hispanic students. Reference category for EOP status is non-EOP students. Reference category for female is male. status is non-EOP students. Reference category for female is male. All models additionally control for prior achievement (SAT scores and cumulative GPA in science). Standard errors in parentheses. \* $p < .05$ , \*\* $p < .01$ , \*\*\* $p < .001$

**Conclusion.** After controlling for gender, ethnicity, and achievement (SAT scores and cumulative science GPA), being in the High Structure section is **not significantly more associated** with belonging for **EOP students** than it is for non-EOP students.

Overall, the High Structure section is associated with higher belonging for EOP students (this is what we know from the equality of median tests above when limiting the comparison to only EOP students). However, the regression shows that the high structure section is not *more* beneficial for EOP students than non-EOP students (if it was, there would be a significant positive interaction term for High Structure x EOP, indicating EOP students get an additional boost to their sense of belonging).



**Hypothesis 5b: URM students in the high structure lecture will have greater sense of belonging (to their MCDB 1A course) than URM students in the large lecture at the end of the course.**

**Figure 5b. Distribution of Sense of Belonging (Full scale) by Section (URM only)**

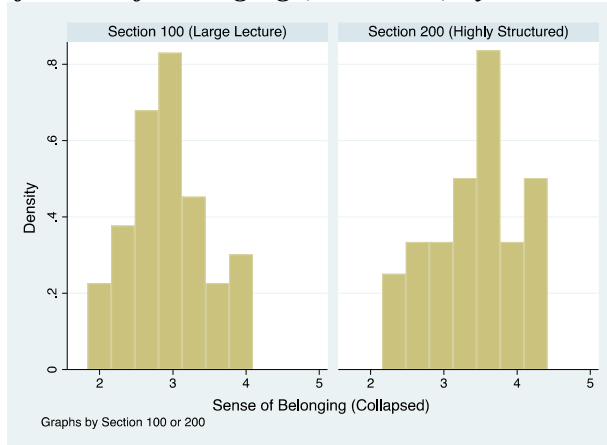

**Table 5b. t-test of Mean Difference – Sense of Belonging (Full scale) by Section (URM only)**

Two-sample t test with equal variances

| Group    | Obs | Mean      | Std. Err. | Std. Dev. | [95% Conf. Interval] |           |
|----------|-----|-----------|-----------|-----------|----------------------|-----------|
| Section1 | 41  | 2.910569  | .0894782  | .5729402  | 2.729727             | 3.091411  |
| Section2 | 37  | 3.43018   | .1003369  | .6103257  | 3.226687             | 3.633673  |
| combined | 78  | 3.157051  | .0727549  | .6425538  | 3.012178             | 3.301925  |
| diff     |     | -.5196111 | .1339988  |           | -.7864928            | -.2527293 |

diff = mean(Section) - mean(Section) **t = -3.8777**  
 Ho: diff = 0 degrees of freedom = 76

Ha: diff < 0 Ha: diff != 0 Ha: diff > 0  
 Pr(T < t) = 0.0001 **Pr(|T| > |t|) = 0.0002** Pr(T > t) = 0.9999

**Conclusion: URM students in Section 200 have a significantly higher sense of belonging (p=0.002) than URM students in Section 100.**

**Figure 5bi. Distribution of Sense of Belonging (Peer Support subscale) by Section (URM only)**

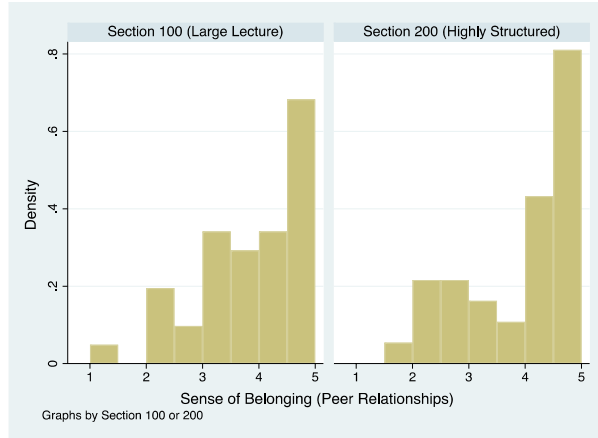

**Table 5bi. Equality of Medians Test– Sense of Belonging (Peer Support subscale) by Section (URM only)**

Median test

| Greater than the median | Section 100 or 200 |           | Total |
|-------------------------|--------------------|-----------|-------|
|                         | Section 1          | Section 2 |       |
| no                      | 25                 | 20        | 45    |
| yes                     | 16                 | 17        | 33    |
| Total                   | 41                 | 37        | 78    |

Pearson  $\chi^2(1) = 0.3817$  Pr = 0.537

Continuity corrected:

Pearson  $\chi^2(1) = 0.1508$  Pr = 0.698

**Conclusion: URM students in Section 200 do not have a significantly higher sense of belonging ( $p=0.537$ ) than URM students in Section 100.**

**Figure 5bii. Distribution of Sense of Belonging (Faculty Support subscale) by Section (URM only)**

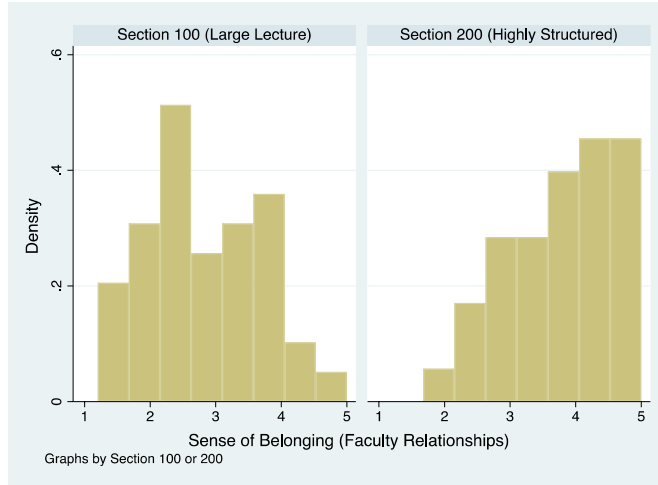

**Table 5bii. Equality of Medians Test– Sense of Belonging (Faculty Support subscale) by Section (URM only)**

Median test

| Greater than the median | Section 100 or 200 |           | Total |
|-------------------------|--------------------|-----------|-------|
|                         | Section 1          | Section 2 |       |
| no                      | 29                 | 12        | 41    |
| yes                     | 12                 | 25        | 37    |
| Total                   | 41                 | 37        | 78    |

Pearson chi2(1) = 11.4413 **Pr = 0.001**

Continuity corrected:

Pearson chi2(1) = 9.9569 Pr = 0.002

**Conclusion: URM students in Section 200 have a significantly higher sense of belonging (p<0.01) than URM students in Section 100.**

**Figure 5biii. Distribution of Sense of Belonging (Classroom Comfort subscale) by Section (URM only)**

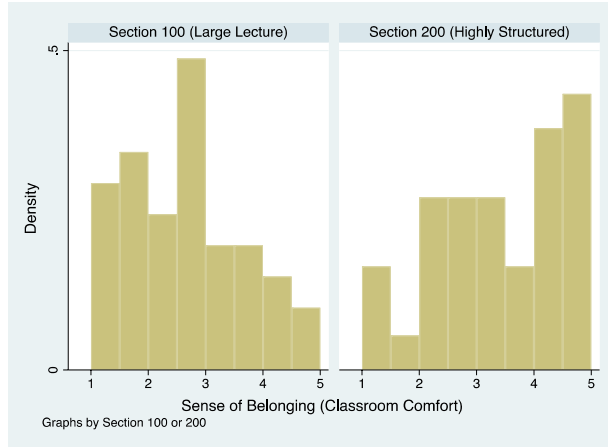

**Table 5biii. Equality of Medians Test– Sense of Belonging (Classroom Comfort subscale) by Section (URM only)**

Median test

| Greater than the median | Section 100 or 200 |           | Total |
|-------------------------|--------------------|-----------|-------|
|                         | Section 1          | Section 2 |       |
| no                      | 28                 | 14        | 42    |
| yes                     | 13                 | 23        | 36    |
| Total                   | 41                 | 37        | 78    |

Pearson chi2(1) = 7.2584 Pr = 0.007

Continuity corrected:

Pearson chi2(1) = 6.0847 Pr = 0.014

**Conclusion: URM students in Section 200 have a significantly higher sense of belonging (p<0.01) than URM students in Section 100.**



UCSB MCDB 1A Survey Analyses

**Table 5br. Regression of Sense of Belonging (Full scale and subscales) on Section, EOP status, and URM status (standardized)**  
*Predicting Sense of Belonging and its Subcomponents by Section, EOP Status, and URM Status*

|                                              | <u>Sense of belonging (all)</u> |                          |                          | <u>Perceived Peer Support</u> |                        |                        | <u>Perceived Faculty Support</u> |                          |                          | <u>Classroom Comfort</u> |                          |                          |
|----------------------------------------------|---------------------------------|--------------------------|--------------------------|-------------------------------|------------------------|------------------------|----------------------------------|--------------------------|--------------------------|--------------------------|--------------------------|--------------------------|
|                                              | model 1                         | model 2                  | model 3                  | model 1                       | model 2                | model 3                | model 1                          | model 2                  | model 3                  | model 1                  | model 2                  | model 3                  |
| High structured section                      | <b>0.33***</b><br>(0.06)        | <b>0.36***</b><br>(0.13) | <b>0.30***</b><br>(0.08) | 0.09<br>(0.12)                | 0.00<br>(0.24)         | 0.03<br>(0.14)         | <b>0.40***</b><br>(0.10)         | <b>0.46***</b><br>(0.20) | <b>0.36***</b><br>(0.12) | <b>0.27***</b><br>(0.13) | <b>0.27*</b><br>(0.25)   | <b>0.31***</b><br>(0.15) |
| <i>Interactions</i>                          |                                 |                          |                          |                               |                        |                        |                                  |                          |                          |                          |                          |                          |
| <i>Section x Race</i>                        |                                 |                          |                          |                               |                        |                        |                                  |                          |                          |                          |                          |                          |
| High structured section<br>x Asian (vs. URM) |                                 | <b>-0.02</b><br>(0.16)   |                          |                               | <b>0.02</b><br>(0.31)  |                        |                                  | <b>0.02</b><br>(0.26)    |                          |                          | <b>-0.05</b><br>(0.32)   |                          |
| High structured section<br>x White (vs. URM) |                                 | <b>-0.04</b><br>(0.16)   |                          |                               | <b>0.15</b><br>(0.30)  |                        |                                  | <b>-0.13</b><br>(0.25)   |                          |                          | <b>0.04</b><br>(0.32)    |                          |
| <i>Section x Income</i>                      |                                 |                          |                          |                               |                        |                        |                                  |                          |                          |                          |                          |                          |
| High structured section<br>x EOP status      |                                 |                          | -0.07<br>(0.13)          |                               |                        | -0.15<br>(0.25)        |                                  |                          | -0.10<br>(0.21)          |                          |                          | 0.09<br>(0.26)           |
| <i>Covariates</i>                            |                                 |                          |                          |                               |                        |                        |                                  |                          |                          |                          |                          |                          |
| <i>Race</i>                                  |                                 |                          |                          |                               |                        |                        |                                  |                          |                          |                          |                          |                          |
| Asian (vs. URM)                              | -0.03<br>(0.09)                 | -0.02<br>(0.12)          | -0.03<br>(0.09)          | -0.02<br>(0.16)               | -0.04<br>(0.22)        | -0.04<br>(0.16)        | 0.01<br>(0.13)                   | 0.00<br>(0.19)           | 0.00<br>(0.14)           | -0.13<br>(0.17)          | -0.10<br>(0.24)          | -0.12<br>(0.17)          |
| White (vs. URM)                              | -0.03<br>(0.09)                 | 0.00<br>(0.12)           | -0.03<br>(0.09)          | -0.06<br>(0.16)               | -0.16<br>(0.23)        | -0.08<br>(0.16)        | 0.02<br>(0.14)                   | 0.10<br>(0.19)           | 0.01<br>(0.14)           | -0.06<br>(0.17)          | -0.08<br>(0.24)          | -0.05<br>(0.17)          |
| <i>Income</i>                                |                                 |                          |                          |                               |                        |                        |                                  |                          |                          |                          |                          |                          |
| EOP Status                                   | -0.05<br>(0.08)                 | -0.05<br>(0.08)          | -0.01<br>(0.10)          | -0.08<br>(0.15)               | -0.09<br>(0.15)        | 0.01<br>(0.19)         | -0.03<br>(0.12)                  | -0.03<br>(0.12)          | 0.03<br>(0.16)           | 0.02<br>(0.15)           | 0.02<br>(0.15)           | -0.04<br>(0.20)          |
| <i>Gender</i>                                |                                 |                          |                          |                               |                        |                        |                                  |                          |                          |                          |                          |                          |
| Female                                       | -0.06<br>(0.07)                 | -0.05<br>(0.07)          | -0.05<br>(0.07)          | <b>0.14*</b><br>(0.13)        | <b>0.14*</b><br>(0.13) | <b>0.15*</b><br>(0.13) | -0.08<br>(0.11)                  | -0.07<br>(0.11)          | -0.07<br>(0.11)          | <b>-0.14*</b><br>(0.13)  | <b>-0.14**</b><br>(0.13) | <b>-0.14**</b><br>(0.13) |
| <i>N</i>                                     | 317                             | 317                      | 317                      | 317                           | 317                    | 317                    | 317                              | 317                      | 317                      | 317                      | 317                      | 317                      |

*Note.* All sense of belonging variables on a scale from (1) low ... (5) high. All coefficients are in standard deviation units. Model 1 estimates main effect of section controlling for covariates. Model 2 includes an estimate of the interaction between section and race. Model 3 includes an estimate of the interaction. Reference category for high structured section is traditional large lecture. Reference category for race is URM, which includes Black and Hispanic students. Reference category for EOP status is non-EOP students. Reference category for female is male. All models additionally control for prior achievement (SAT scores and cumulative GPA in science). Standard errors in parentheses. \* $p < .05$ , \*\* $p < .01$ , \*\*\* $p < .001$

**Conclusion.** After controlling for gender, income, and achievement (SAT scores and cumulative science GPA), being in the High Structure section is **not significantly more associated** with belonging for **URM students**(reference group) than it is for non-URM students (Asian, Caucasian).

Overall, the High Structure section is associated with higher belonging for URM students (this is what we know from the equality of median tests above when limiting the comparison to only URM students). However, the regression shows that the high structure section is not *more* beneficial for URM students than non-URM students such as White and Asian students (if it was, there would be a significant positive interaction term for High Structure x White or High Structure x Asian, indicating White or Asian students in the High structure section get an additional boost or less of a boost to their sense of belonging when compared specifically to URM students).

## UCSB MCDB 1A Survey Analyses



**References**

- Hoffman, M., Richmond, J., Morrow, J., & Salomone, K. (2003). Investigating “sense of belonging” in first-year college students. *Journal of College Student Retention, 4*(3), 227–256.
- Tovar, E., & Simon, M. A. (2010). Factorial structure and invariance analysis of the sense of belonging scales. *Measurement and Evaluation in Counseling and Development, 43*(3), 199–217. <http://doi.org/10.1177/0748175610384811>

### Supplemental Figure 1

**A** 2016 Cohort

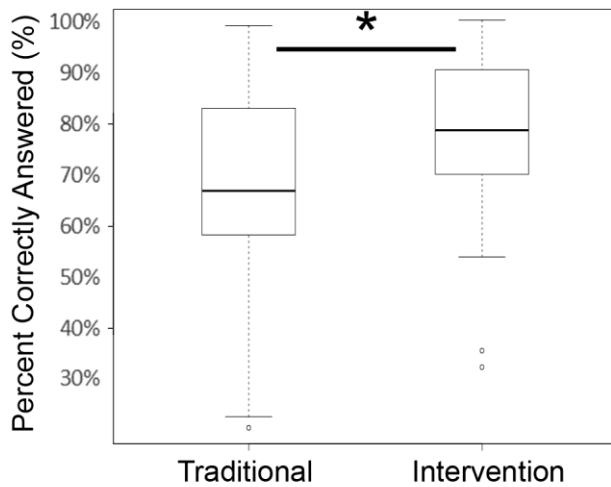

**C** 2015 Cohort

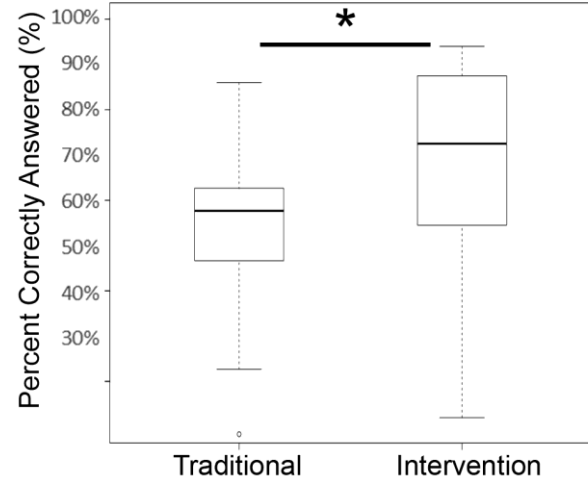

**B**

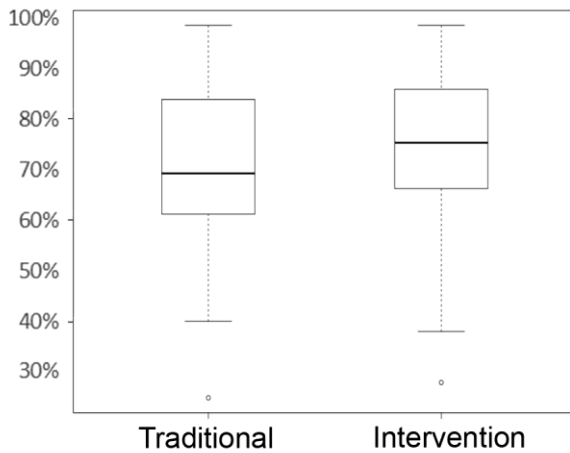

**D**

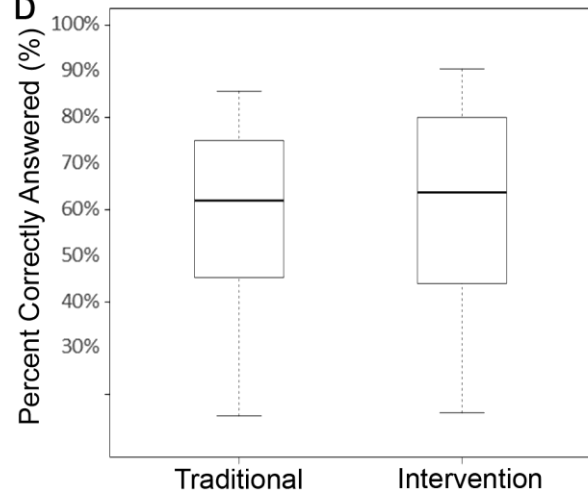

**Supplemental Figure 1. The 2016 (A and B) and 2015 (C and D) intervention course outperforms traditional section on common exam questions.** A comparison of academic performance in the intervention and traditional courses as measured by assessing percent correct answers on shared exam questions. Presented is the average number of correct responses per student on common exam question when content was delivered by active learning (A and C) or via lecture alone (B and D). Asterisks denote statistically significant differences between populations as determined by Welch two sample t-test. (A: p-value =  $1.244 \times 10^{-8}$ , B: p-value = 0.491, C: p-value =  $4.116 \times 10^{-5}$ , D: p-value = 0.5462).

## Supplemental Figure 2.

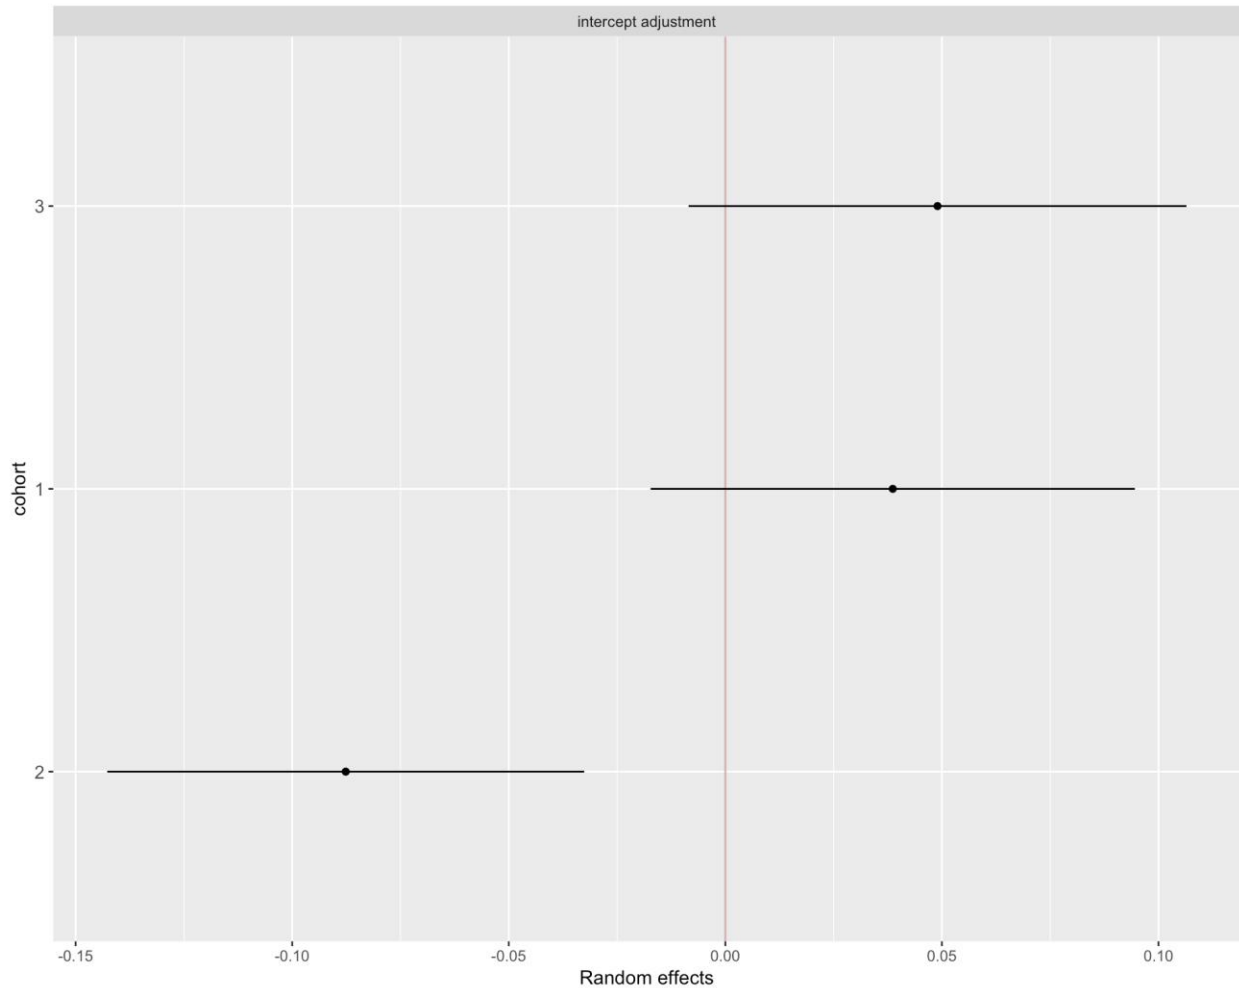

**Supplemental Figure 2.** Random effect of cohort and year with confidence intervals of *Introductory Biology I* final grade. Caterpillar dotplots with confidence intervals of the size of the random intercept for each cohort and year (1 = 2016, 2 = 2015, 3 = 2017). The confidence intervals do not all overlap indicating that the model needs to include cohort and year as a random intercept. Further, we see that the random intercept increases with year, indicating that students got stronger each successive year.

**Supplemental Figure 3.**

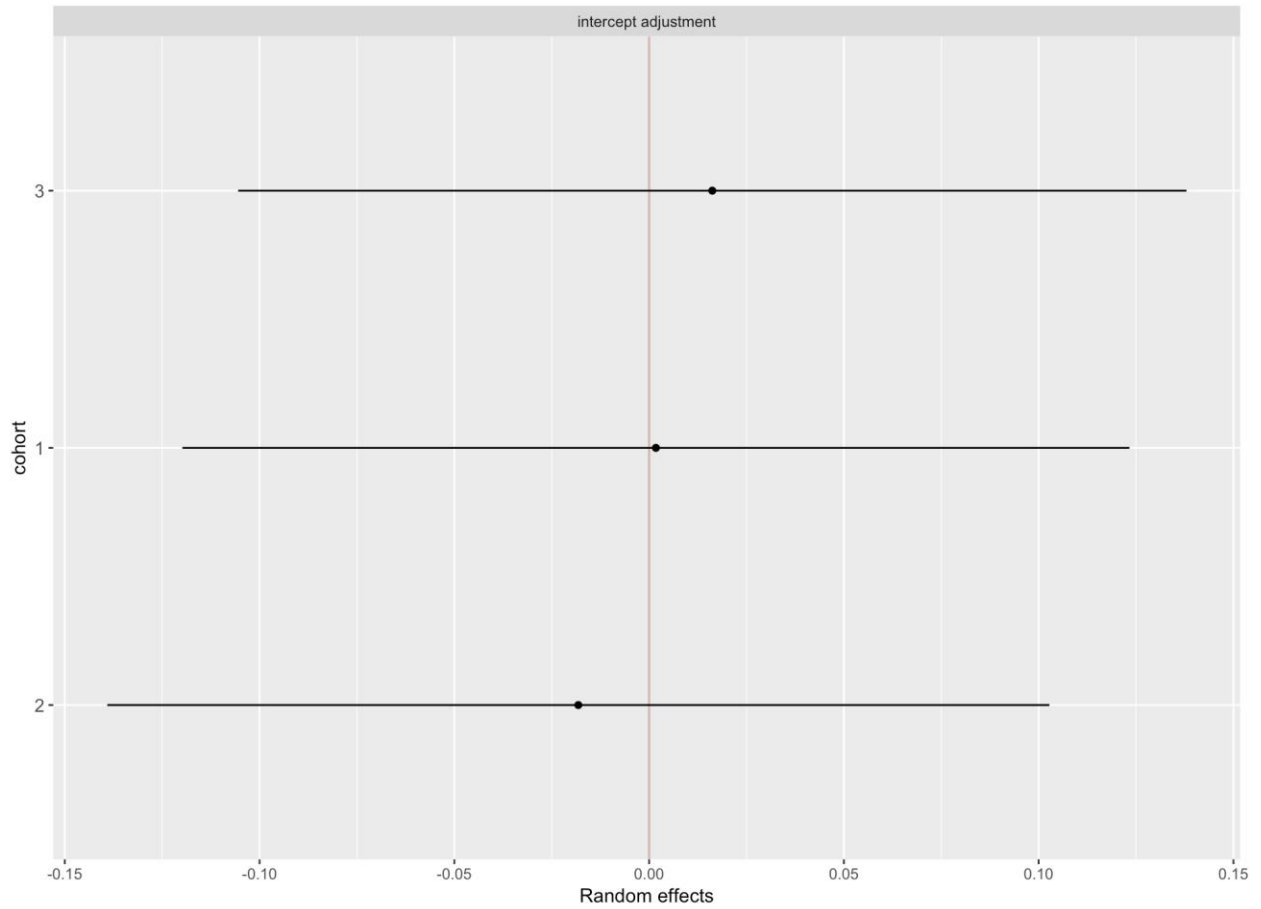

**Supplemental Figure 3.** Random effect of cohort and year with confidence intervals of student retention in *Introductory Biology II*. Caterpillar dotplots with confidence intervals of the size of the random intercept for each cohort and year (1 = 2016, 2 = 2015, 3 = 2017). The confidence intervals overlap indicating that the model does not need to include cohort and year as a random intercept.

#### Supplemental Figure 4.

Covariates included in mediation analyses

Introductory Biology I final grade

Traditional/intervention course

Gender

Ethnicity

EOP status

Total SAT

Cumulative science GPA (first year)

*Mediation package and code for R*

```
med.fit <- lm(Introductory Biology I final grade ~ traditional/intervention course + Gender x  
traditional/intervention course + ethnicity x traditional/intervention course + EOP x  
traditional/intervention course + Total SAT + cumulative science GPA (first year), data =  
dataframe)
```

```
out.fit <- glm(Introductory Biology II retention ~ traditional/intervention course + Gender x  
traditional/intervention course + ethnicity x traditional/intervention course + EOP x  
traditional/intervention course + Total SAT + cumulative science GPA (first year), data =  
dataframe)
```

```
med.out <- mediate(med.fit, out.fit, treat = " traditional/intervention course ", mediator =  
"Introductory Biology I final grade", sims = 2000, boot = TRUE)
```

```
summary(med.out)
```

```
plot(med.out, main = "Size of effects with 95% bootstrap CIs")  
legend("topleft", c("Intervention", "Traditional"), lty = c(1,3))
```

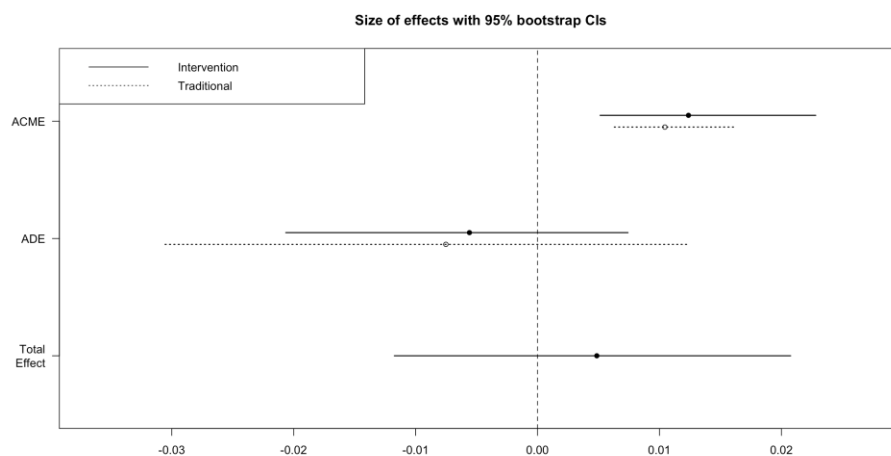

Effect size of ACME (mediating effect of grade earned in *Introductory Biology I*), ADE (direct effect of *Introductory Biology I*), and Total Effect of intervention or traditional section of *Introductory Biology I* on retention of students into *Introductory Biology II*.

**Supplemental Table 1.**  
**Logistic Regression of Student Retention in Biology**  
**Identified Model:**

Retained BioMajor Spring Quarter Fourth Year ~ Gender + ethnicity + EOP + Cumulative Science GPA Spring Quarter First Year (4.0 scale) + Gender x Cumulative Science GPA Spring Quarter First Year + ethnicity x EOP

**Table S1.** Analysis of Biology Student Retention Logistic Regression

| <b>Coefficients</b>                                      | <b>Estimate (<math>\beta</math>)</b> | <b>Standard Error</b> | <b><i>p</i></b> |
|----------------------------------------------------------|--------------------------------------|-----------------------|-----------------|
| Intercept                                                | 1.06062                              | 0.29617               | ***             |
| GenderMale                                               | 0.28896                              | 0.21189               | -               |
| <b>ethnicityCaucasian</b>                                | <b>-0.73945</b>                      | <b>0.33783</b>        | <b>*</b>        |
| ethnicityURM                                             | -0.41164                             | 0.41506               | -               |
| EOP                                                      | -0.53660                             | 0.36987               | -               |
| ethnicityCaucasian x EOP                                 | 0.95839                              | 0.55881               | -               |
| ethnicityUnknown x EOP                                   | -14.813                              | 476.501               | -               |
| ethnicityURM x EOP                                       | 0.05816                              | 0.53350               | -               |
| <b>Cumulative Science GPA Spring 1<sup>st</sup> Year</b> | <b>0.95839</b>                       | <b>0.16051</b>        | <b>***</b>      |
| GenderMale x Cumulative Sci GPA 1 <sup>st</sup> Year     | -0.33103                             | 0.22605               | -               |

2012 cohort of declared biology majors. Initial entry n = 1000. Asterisks denote significance levels, \* = 0.05, \*\*\* = 0.

Deviance Residuals:

|         |         |        |        |        |
|---------|---------|--------|--------|--------|
| Min     | 1Q      | Median | 3Q     | Max    |
| -2.2183 | -1.0079 | 0.6035 | 0.9196 | 2.1999 |

AIC: 591.62

Number of Fisher Scoring iterations: 13

**Supplemental Table 2.****Multiple Linear Regression of First Year Student Cumulative Science GPA****Identified Model:**Cumulative Science GPA Spring 1<sup>st</sup> Year (4.0 scale) ~ Gender + ethnicity + EOP + Total SAT Score +

Gender: Total SAT Score

AIC: 787.81

Residual standard error: 0.5178

Multiple R-squared: 0.2019, Adjusted R-squared: 0.1898

F-statistic: 16.75, p-value: &lt; 2.2e-16

Residuals:

**Table S2.** Analysis of Biology Student Cumulative Science GPAMultipleLinear Regression

| <b>Coefficients</b>       | <b>Estimate (<math>\beta</math>)</b> | <b>Standard Error</b> | <b>p</b>   |
|---------------------------|--------------------------------------|-----------------------|------------|
| Intercept                 | 1.0382818                            | 0.3260121             | **         |
| GenderMale                | 0.6918737                            | 0.4608804             | -          |
| <b>EthnicityCaucasian</b> | <b>0.1094359</b>                     | <b>0.0522205</b>      | <b>*</b>   |
| <b>EthnicityURM</b>       | <b>-0.1478364</b>                    | <b>0.0564669</b>      | <b>**</b>  |
| ethnicityInternational    | 0.3931096                            | 0.2248618             | -          |
| ethnicityUnknown          | -0.1622862                           | 0.2146000             | -          |
| <b>EOP</b>                | <b>-0.1116914</b>                    | <b>0.0506749</b>      | <b>*</b>   |
| <b>Total SAT</b>          | <b>0.0010189</b>                     | <b>0.0001683</b>      | <b>***</b> |
| GenderMale x Total SAT    | -0.0003499                           | 0.0002428             | -          |

2012 cohort of declared biology majors. Initial entry n = 1000. Asterisks denote significance levels, \* = 0.05, \*\* = 0.01, \*\*\* = 0.

| Min      | 1Q       | Median  | 3Q      | Max     |
|----------|----------|---------|---------|---------|
| -1.37540 | -0.37770 | 0.03386 | 0.41402 | 1.17068 |

**Supplemental Table 3.**  
**Multilevel Logistic Regression of Student Enrollment in Two Courses of *Introductory Biology I***  
**Identified Model:**

**Table 3.** Estimated regression coefficients from multilevel logistic regression of student demographics across *Introductory Biology I* courses

| <b>Coefficients</b>                                | <b>Estimate (<math>\beta</math>)</b> | <b>Standard Error</b> | <b>z-value</b> | <b>p</b>   |
|----------------------------------------------------|--------------------------------------|-----------------------|----------------|------------|
| Intercept                                          | -0.55130                             | 0.38463               | -1.433         | -          |
| Gender Male                                        | -0.25751                             | 0.11465               | -2.246         | -          |
| Ethnicity Caucasian                                | -0.16739                             | 0.13262               | -1.262         | -          |
| Ethnicity URM                                      | 0.01686                              | 0.15387               | 0.110          | -          |
| Ethnicity International                            | -0.37932                             | 0.45814               | -0.828         | -          |
| Ethnicity Unknown                                  | -0.56601                             | 0.44291               | -1.363         | -          |
| EOP                                                | 0.25673                              | 0.13983               | 1.836          | -          |
| <b>Total SAT</b>                                   | <b>0.29474</b>                       | <b>0.08036</b>        | 4.209          | <b>***</b> |
| Cumulative Science GPA Spring 1 <sup>st</sup> Year | 0.13815                              | 0.10350               | 1.243          | -          |

Traditional section of the course is the reference group. Combined 2015-2017 cohorts of declared biology majors in *Introductory Biology I*. n = 1602. Asterisks denote significance levels, \* = 0.05, \*\* = 0.01, \*\*\* = 0.



**Supplemental Table 4.**  
**ANOVA table with significance of random effects variable of cohort year**

**Table S4.** ANOVA table for logistic regression analysis of student demographics between Traditional and Intervention course with significance of random effects variable of cohort year

| <b>Model</b>                                 | <b>df</b> | <b>AIC</b> | <b><i>p</i></b> |
|----------------------------------------------|-----------|------------|-----------------|
| Logistic Regression                          | 9         | 2072.8     | -               |
| Multilevel Logistic Regression + Cohort Year | 10        | 1963.5     | < 2.2e-16       |

Combined 2015-2017 cohort data of declared Biology Majors students. n = 1612.

**Supplemental Table 5.**  
**ANOVA table with significance of random effects variable of cohort year**

---

**Table S5.** ANOVA table for multiple linear regression analysis of earned *Introductory Biology I* final grade with significance of random effects variable of cohort year

---

| <b>Model</b>                               | <b>df</b> | <b>AIC</b> | <b><i>p</i></b> |
|--------------------------------------------|-----------|------------|-----------------|
| Multiple Linear Regression                 | 17        | 3459.6     | -               |
| Multilevel Linear Regression + Cohort Year | 18        | 3453.5     | 0.004438        |

---

Combined 2015-2017 cohort data of declared Biology Majors students. n = 1612.

---

**Table S6A. Predicting Sense of Belonging (Full scale) with all covariates and interaction terms (standardized)**

Table A

| Regressions of sense of belonging on section |                          |                          |                          |                          |                 |                         |
|----------------------------------------------|--------------------------|--------------------------|--------------------------|--------------------------|-----------------|-------------------------|
|                                              | Sense of belonging (all) |                          |                          |                          |                 |                         |
|                                              | m1                       | m2                       | m3                       | m4                       | m5              | m6                      |
| Intervention Course                          | <b>0.33***</b><br>(0.06) | <b>0.35***</b><br>(0.13) | <b>0.30***</b><br>(0.08) | <b>0.31***</b><br>(0.11) | 0.06<br>(0.34)  | 0.42<br>(0.68)          |
| <u>Interactions</u>                          |                          |                          |                          |                          |                 |                         |
| <i>Section x race</i>                        |                          |                          |                          |                          |                 |                         |
| Intervention Course<br>x Asian (vs. URM)     |                          | -0.02<br>(0.16)          |                          |                          |                 |                         |
| Intervention Course<br>x White (vs. URM)     |                          | -0.03<br>(0.16)          |                          |                          |                 |                         |
| <i>Section x income</i>                      |                          |                          |                          |                          |                 |                         |
| Intervention Course<br>x EOP status          |                          |                          | 0.07<br>(0.13)           |                          |                 |                         |
| <i>Section x gender</i>                      |                          |                          |                          |                          |                 |                         |
| Intervention Course<br>x Female              |                          |                          |                          | 0.03<br>(0.13)           |                 |                         |
| <i>Section x prior achievement</i>           |                          |                          |                          |                          |                 |                         |
| Intervention Course<br>x Science GPA         |                          |                          |                          |                          | 0.28<br>(0.11)  |                         |
| Intervention Course<br>x SAT score           |                          |                          |                          |                          |                 | -0.10<br>(0.00)         |
| <u>Covariates</u>                            |                          |                          |                          |                          |                 |                         |
| <i>Race</i>                                  |                          |                          |                          |                          |                 |                         |
| Asian (vs. URM)                              | -0.05<br>(0.09)          | -0.04<br>(0.12)          | -0.06<br>(0.09)          | -0.05<br>(0.09)          | -0.05<br>(0.09) | -0.05<br>(0.09)         |
| White (vs. URM)                              | -0.04<br>(0.09)          | -0.02<br>(0.12)          | -0.04<br>(0.09)          | -0.04<br>(0.09)          | -0.04<br>(0.09) | -0.04<br>(0.09)         |
| <i>Income</i>                                |                          |                          |                          |                          |                 |                         |
| EOP status                                   | -0.05<br>(0.08)          | -0.04<br>(0.08)          | 0.00<br>(0.10)           | -0.05<br>(0.08)          | -0.05<br>(0.08) | -0.05<br>(0.08)         |
| <i>Gender</i>                                |                          |                          |                          |                          |                 |                         |
| Female                                       | -0.04<br>(0.07)          | -0.04<br>(0.07)          | -0.04<br>(0.07)          | -0.06<br>(0.09)          | -0.03<br>(0.07) | -0.04<br>(0.07)         |
| <i>Prior achievement</i>                     |                          |                          |                          |                          |                 |                         |
| Science GPA                                  | <b>0.16**</b><br>(0.06)  | <b>0.16**</b><br>(0.06)  | <b>0.16**</b><br>(0.06)  | <b>0.16**</b><br>(0.06)  | 0.12<br>(0.08)  | <b>0.16**</b><br>(0.06) |
| SAT score                                    | 0.07<br>(0.00)           | 0.07<br>(0.00)           | 0.07<br>(0.00)           | 0.07<br>(0.00)           | 0.08<br>(0.00)  | 0.08<br>(0.00)          |
| Observations                                 | 317                      | 317                      | 317                      | 317                      | 317             | 317                     |

Note. All sense of belonging variables on a scale from (1) low ... (5) high. All coefficients are in standard deviation units. Standard errors in parentheses. \* $p < .05$ , \*\* $p < .01$ , \*\*\* $p < .001$ . Model 1 estimates main effect of the Intervention Course controlling for covariates. The remaining models include an estimate of the interaction. Reference category for Intervention Course is Traditional Course. Reference category for race is URM, which includes Black and Hispanic students. Reference for EOP status is non-EOP.

**Table S6B. Predicting Sense of Belonging (Perceived peer support subscale) with all covariates and interaction terms (standardized)**

Table B

| Regressions of perceived peer support on section |                                             |                        |                         |                        |                         |                         |
|--------------------------------------------------|---------------------------------------------|------------------------|-------------------------|------------------------|-------------------------|-------------------------|
|                                                  | Sense of belonging (Perceived peer support) |                        |                         |                        |                         |                         |
|                                                  | m1                                          | m2                     | m3                      | m4                     | m5                      | m6                      |
| Intervention Course                              | 0.08<br>(0.12)                              | -0.01<br>(0.24)        | 0.02<br>(0.14)          | -0.08<br>(0.20)        | -0.15<br>(0.64)         | -0.14<br>(1.28)         |
| <u>Interactions</u>                              |                                             |                        |                         |                        |                         |                         |
| <i>Section x race</i>                            |                                             |                        |                         |                        |                         |                         |
| Intervention Course<br>x Asian (vs. URM)         |                                             | 0.03<br>(0.31)         |                         |                        |                         |                         |
| Intervention Course<br>x White (vs. URM)         |                                             | 0.16<br>(0.30)         |                         |                        |                         |                         |
| <i>Section x income</i>                          |                                             |                        |                         |                        |                         |                         |
| Intervention Course<br>x EOP status              |                                             |                        | 0.15<br>(0.25)          |                        |                         |                         |
| <i>Section x gender</i>                          |                                             |                        |                         |                        |                         |                         |
| Intervention Course<br>x Female                  |                                             |                        |                         | <b>0.24*</b><br>(0.25) |                         |                         |
| <i>Section x prior achievement</i>               |                                             |                        |                         |                        |                         |                         |
| Intervention Course<br>x Science GPA             |                                             |                        |                         |                        | 0.25<br>(0.21)          |                         |
| Intervention Course<br>x SAT score               |                                             |                        |                         |                        |                         | 0.23<br>(0.00)          |
| <u>Covariates</u>                                |                                             |                        |                         |                        |                         |                         |
| <i>Race</i>                                      |                                             |                        |                         |                        |                         |                         |
| Asian (vs. URM)                                  | -0.04<br>(0.16)                             | -0.06<br>(0.23)        | -0.05<br>(0.16)         | -0.03<br>(0.16)        | -0.04<br>(0.16)         | -0.04<br>(0.16)         |
| White (vs. URM)                                  | -0.07<br>(0.16)                             | -0.17<br>(0.23)        | -0.08<br>(0.16)         | -0.08<br>(0.16)        | -0.08<br>(0.17)         | -0.07<br>(0.17)         |
| <i>Income</i>                                    |                                             |                        |                         |                        |                         |                         |
| EOP status                                       | -0.07<br>(0.15)                             | -0.08<br>(0.15)        | 0.02<br>(0.19)          | -0.07<br>(0.15)        | -0.07<br>(0.15)         | -0.07<br>(0.15)         |
| <i>Gender</i>                                    |                                             |                        |                         |                        |                         |                         |
| Female                                           | <b>0.15**</b><br>(0.12)                     | <b>0.14*</b><br>(0.13) | <b>0.16**</b><br>(0.12) | 0.03<br>(0.18)         | <b>0.16**</b><br>(0.13) | <b>0.15**</b><br>(0.13) |
| <i>Prior achievement</i>                         |                                             |                        |                         |                        |                         |                         |
| Science GPA                                      | 0.11<br>(0.11)                              | 0.10<br>(0.11)         | 0.11<br>(0.11)          | 0.13<br>(0.11)         | 0.07<br>(0.14)          | 0.11<br>(0.11)          |
| SAT score                                        | -0.01<br>(0.00)                             | -0.01<br>(0.00)        | -0.02<br>(0.00)         | -0.03<br>(0.00)        | -0.01<br>(0.00)         | -0.03<br>(0.00)         |
| Observations                                     | 317                                         | 317                    | 317                     | 317                    | 317                     | 317                     |

Note. All sense of belonging variables on a scale from (1) low ... (5) high. All coefficients are in standard deviation units. Standard errors in parentheses. \* $p < .05$ , \*\* $p < .01$ , \*\*\* $p < .001$ . Model 1 estimates main effect of the Intervention Course controlling for covariates. The remaining models include an estimate of the interaction. Reference category for Intervention Course is Traditional Course. Reference category for race is URM, which includes Black and Hispanic students. Reference for EOP status is non-EOP.

**Table S6C. Predicting Sense of Belonging (Perceived faculty support subscale) with all covariates and interaction terms (standardized)**

Table C

| Regressions of perceived faculty support on section |                                                |                        |                   |                   |                 |                 |
|-----------------------------------------------------|------------------------------------------------|------------------------|-------------------|-------------------|-----------------|-----------------|
|                                                     | Sense of belonging (Perceived faculty support) |                        |                   |                   |                 |                 |
|                                                     | m1                                             | m2                     | m3                | m4                | m5              | m6              |
| Intervention Course                                 | 0.40***<br>(0.10)                              | 0.45***<br>(0.20)      | 0.36***<br>(0.12) | 0.40***<br>(0.17) | 0.22<br>(0.54)  | 0.90<br>(1.06)  |
| <u>Interactions</u>                                 |                                                |                        |                   |                   |                 |                 |
| <i>Section x race</i>                               |                                                |                        |                   |                   |                 |                 |
| Intervention Course<br>x Asian (vs. URM)            |                                                | 0.01<br>(0.26)         |                   |                   |                 |                 |
| Intervention Course<br>x White (vs. URM)            |                                                | -0.12<br>(0.25)        |                   |                   |                 |                 |
| <i>Section x income</i>                             |                                                |                        |                   |                   |                 |                 |
| Intervention Course<br>x EOP status                 |                                                |                        | 0.10<br>(0.21)    |                   |                 |                 |
| <i>Section x gender</i>                             |                                                |                        |                   |                   |                 |                 |
| Intervention Course<br>x Female                     |                                                |                        |                   | 0.00<br>(0.21)    |                 |                 |
| <i>Section x prior achievement</i>                  |                                                |                        |                   |                   |                 |                 |
| Intervention Course<br>x Science GPA                |                                                |                        |                   |                   | 0.19<br>(0.17)  |                 |
| Intervention Course<br>x SAT score                  |                                                |                        |                   |                   |                 | -0.51<br>(0.00) |
| <u>Covariates</u>                                   |                                                |                        |                   |                   |                 |                 |
| <i>Race</i>                                         |                                                |                        |                   |                   |                 |                 |
| Asian (vs. URM)                                     | -0.01<br>(0.13)                                | -0.02<br>(0.19)        | -0.02<br>(0.13)   | -0.01<br>(0.13)   | -0.01<br>(0.13) | -0.01<br>(0.13) |
| White (vs. URM)                                     | 0.00<br>(0.14)                                 | 0.08<br>(0.19)         | 0.00<br>(0.14)    | 0.00<br>(0.14)    | 0.00<br>(0.14)  | 0.00<br>(0.14)  |
| <i>Income</i>                                       |                                                |                        |                   |                   |                 |                 |
| EOP status                                          | -0.02<br>(0.12)                                | -0.02<br>(0.12)        | 0.04<br>(0.16)    | -0.02<br>(0.12)   | -0.02<br>(0.12) | -0.02<br>(0.12) |
| <i>Gender</i>                                       |                                                |                        |                   |                   |                 |                 |
| Female                                              | -0.06<br>(0.10)                                | -0.05<br>(0.10)        | -0.06<br>(0.10)   | -0.06<br>(0.15)   | -0.06<br>(0.10) | -0.06<br>(0.10) |
| <i>Prior achievement</i>                            |                                                |                        |                   |                   |                 |                 |
| Science GPA                                         | 0.11<br>(0.10)                                 | <b>0.12*</b><br>(0.10) | 0.11<br>(0.09)    | 0.11<br>(0.10)    | 0.08<br>(0.12)  | 0.11<br>(0.10)  |
| SAT score                                           | 0.05<br>(0.00)                                 | 0.05<br>(0.00)         | 0.05<br>(0.00)    | 0.05<br>(0.00)    | 0.05<br>(0.00)  | 0.09<br>(0.00)  |
| Observations                                        | 317                                            | 317                    | 317               | 317               | 317             | 317             |

Note. All sense of belonging variables on a scale from (1) low ... (5) high. All coefficients are in standard deviation units. Standard errors in parentheses. \* $p < .05$ , \*\* $p < .01$ , \*\*\* $p < .001$ . Model 1 estimates main effect of the Intervention Course controlling for covariates. The remaining models include an estimate of the interaction. Reference category for Intervention Course is Traditional Course. Reference category for race is URM, which includes Black and Hispanic students. Reference for EOP status is non-EOP.

**Table S6D. Predicting Sense of Belonging (Classroom comfort subscale) with all covariates and interaction terms (standardized)**

Table D

| Regressions of perceived faculty support on section |                                                  |                         |                          |                         |                         |                         |
|-----------------------------------------------------|--------------------------------------------------|-------------------------|--------------------------|-------------------------|-------------------------|-------------------------|
|                                                     | Sense of belonging (Perceived classroom comfort) |                         |                          |                         |                         |                         |
|                                                     | m1                                               | m2                      | m3                       | m4                      | m5                      | m6                      |
| Intervention Course                                 | <b>0.27***</b><br>(0.13)                         | <b>0.28**</b><br>(0.25) | <b>0.31***</b><br>(0.15) | <b>0.24**</b><br>(0.21) | -0.20<br>(0.67)         | 0.18<br>(1.34)          |
| <u>Interactions</u>                                 |                                                  |                         |                          |                         |                         |                         |
| <i>Section x race</i>                               |                                                  |                         |                          |                         |                         |                         |
| Intervention Course<br>x Asian (vs. URM)            |                                                  | -0.05<br>(0.32)         |                          |                         |                         |                         |
| Intervention Course<br>x White (vs. URM)            |                                                  | 0.03<br>(0.32)          |                          |                         |                         |                         |
| <i>Section x income</i>                             |                                                  |                         |                          |                         |                         |                         |
| Intervention Course<br>x EOP status                 |                                                  |                         | -0.08<br>(0.26)          |                         |                         |                         |
| <i>Section x gender</i>                             |                                                  |                         |                          |                         |                         |                         |
| Intervention Course<br>x Female                     |                                                  |                         |                          | 0.05<br>(0.26)          |                         |                         |
| <i>Section x prior achievement</i>                  |                                                  |                         |                          |                         |                         |                         |
| Intervention Course<br>x Science GPA                |                                                  |                         |                          |                         | 0.51<br>(0.22)          |                         |
| Intervention Course<br>x SAT score                  |                                                  |                         |                          |                         |                         | 0.10<br>(0.00)          |
| <u>Covariates</u>                                   |                                                  |                         |                          |                         |                         |                         |
| <i>Race</i>                                         |                                                  |                         |                          |                         |                         |                         |
| Asian (vs. URM)                                     | <b>-0.14*</b><br>(0.17)                          | -0.11<br>(0.24)         | -0.13<br>(0.17)          | -0.14<br>(0.17)         | <b>-0.14*</b><br>(0.17) | <b>-0.14*</b><br>(0.17) |
| White (vs. URM)                                     | -0.06<br>(0.17)                                  | -0.08<br>(0.24)         | -0.05<br>(0.17)          | -0.06<br>(0.17)         | -0.07<br>(0.17)         | -0.06<br>(0.17)         |
| <i>Income</i>                                       |                                                  |                         |                          |                         |                         |                         |
| EOP status                                          | 0.02<br>(0.15)                                   | 0.02<br>(0.16)          | -0.04<br>(0.20)          | 0.01<br>(0.15)          | 0.01<br>(0.15)          | 0.02<br>(0.15)          |
| <i>Gender</i>                                       |                                                  |                         |                          |                         |                         |                         |
| Female                                              | <b>-0.13*</b><br>(0.13)                          | <b>-0.14*</b><br>(0.13) | <b>-0.13*</b><br>(0.13)  | <b>-0.15*</b><br>(0.19) | <b>-0.12*</b><br>(0.13) | <b>-0.13*</b><br>(0.13) |
| <i>Prior achievement</i>                            |                                                  |                         |                          |                         |                         |                         |
| Science GPA                                         | <b>0.18**</b><br>(0.12)                          | <b>0.17**</b><br>(0.12) | <b>0.18**</b><br>(0.12)  | <b>0.18**</b><br>(0.12) | 0.10<br>(0.15)          | <b>0.18**</b><br>(0.12) |
| SAT score                                           | 0.074<br>(0.00)                                  | 0.076<br>(0.00)         | 0.078<br>(0.00)          | 0.07<br>(0.00)          | 0.079<br>(0.00)         | 0.067<br>(0.00)         |
| Observations                                        | 317                                              | 317                     | 317                      | 317                     | 317                     | 317                     |

Note. All sense of belonging variables on a scale from (1) low ... (5) high. All coefficients are in standard deviation units. Standard errors in parentheses. \* $p < .05$ , \*\* $p < .01$ , \*\*\* $p < .001$ . Model 1 estimates main effect of the Intervention Course controlling for covariates. The remaining models include an estimate of the interaction. Reference category for Intervention Course is Traditional Course. Reference category for race is URM, which includes Black and Hispanic students. Reference for EOP status is non-EOP.

**Supplemental Table 7.**  
**ANOVA table with significance of random effects variable of cohort year**

---

**Table S7.** ANOVA table for multiple logistic regression analysis of student retention in *Introductory Biology II* in the subsequent quarter with random effects variable of cohort year

---

| <b>Model</b>                                 | <b>df</b> | <b>AIC</b> | <b>p</b> |
|----------------------------------------------|-----------|------------|----------|
| Multiple Logistic Regression                 | 17        | 350.72     | -        |
| Multilevel Logistic Regression + Cohort Year | 18        | 352.58     | 0.7008   |

---

Combined 2015-2017 cohort data of declared Biology Majors students. n = 1612.

---
